# Supplementary material
Source: Royal Society of Chemistry journal article supplement (doi:10.1039/d6ce00126b)
Supplement: d6ce00126b1.pdf [file d6ce00126b1.pdf]

*Supplementary Information*

# Stepwise Introduction of Dipole Blades into Triptycenes: Opening Variety of the Crystalline Molecular Packing Modes

Hikaru Yamamoto<sup>1</sup>, Tsubakihara Yoshichika<sup>2</sup>, Ayana-Sato-Tomita<sup>3</sup>, Mingoo Jin<sup>4\*</sup>

<sup>1</sup>Graduate School of Chemical Science and Engineering, Hokkaido University, Hokkaido 060-8628, Japan

<sup>2</sup>Department of Chemistry, Faculty of Science, Hokkaido University, Hokkaido 060-8628, Japan

<sup>3</sup>Division of Biophysics, Jichi Medical University, Tochigi, 329-0498, Japan

<sup>4</sup>Institute for Chemical Reaction Design and Discovery (WPI-ICReDD), Hokkaido University, Sapporo, Hokkaido, 060-8628, Japan

Email: mingoo@icredd.hokudai.ac.jp

---

## Contents

---

| SECTION                                                              | Page No. |
|----------------------------------------------------------------------|----------|
| 1. General                                                           | S2       |
| 2. Synthesis and crystal preparation                                 | S3       |
| 3. Thermogravimetric Analysis (TGA) of Crystal 1a, 1b and 1c         | S9       |
| 4. Differential Scanning Calorimetry (DSC) of Crystal 1a, 1b and 1c  | S11      |
| 5. Single-Crystal X-Ray Structural Analyses                          | S13      |
| 6. DFT Calculations                                                  | S18      |
| 7. Analysis of Non-Covalent Interactions of Crystal 1b and 1c        | S20      |
| 8. Reference                                                         | S21      |
| 9. NMR Spectra                                                       | S22      |
| 10. Cartesian Coordinates of the Geometries used in DFT Calculations | S38      |

---

## **1. General**

All commercially available reagents and solvents are reagent grade and were used without further purification unless otherwise noted. Solvents for the synthesis were purchased from commercial suppliers, degassed by three freeze-pump-thaw cycles and further dried over molecular sieves (4 Å). NMR spectra were recorded on a JEOL JNM-ECX400P or JNM-ECS400 ( $^1\text{H}$ : 400 MHz;  $^{13}\text{C}$ : 99.5 MHz) using tetramethylsilane and  $\text{CDCl}_3$  as internal standards, respectively. Elemental analyses and low- and high-resolution mass spectra were recorded at the Global Facility Center at Hokkaido University.

## 2. Synthesis

### 2.1 Synthesis of 3b

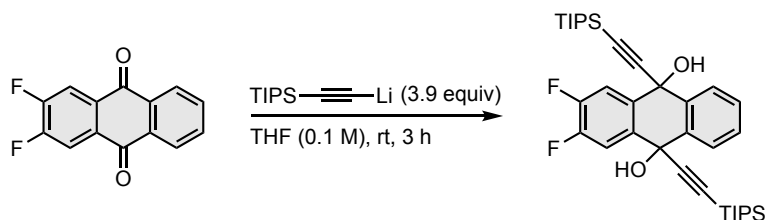

At  $-78\text{ }^{\circ}\text{C}$ , under a nitrogen atmosphere, *n*-BuLi in hexanes (1.55 M, 15.1 mL, 23.4 mmol) was added to a solution of TIPS-acetylene (5.38 mL, 4.38 g, 24.0 mmol) in THF (0.5 M). The mixture was allowed to stir for 15 min before being transferred slowly via cannula into a suspension of **2b** (1.5 g, 6.0 mmol) in THF (0.5 M). The resulting suspension was stirred for 3 h. After reaction, water was added, the organic layer was taken, and the aqueous phase extracted with  $\text{CH}_2\text{Cl}_2$  ( $2 \times 50\text{ mL}$ ). The combined organic phases were dried  $\text{MgSO}_4$  and taken to dryness under reduced pressure to give a solid residue. The crude material was purified by silica column using hexane/ $\text{Et}_2\text{O}$  (4:1) as an eluent provided the desired product **3b** (1.4 g, 38%).  $^1\text{H}$  NMR (400 MHz,  $\text{CDCl}_3$ ,  $\delta$ ): 1.04-1.10 (m, 42H), 2.89 (s, 2H), 7.48 (dd,  $J = 3.4\text{ Hz}$  and  $5.8\text{ Hz}$ , 2H), 7.90 (t,  $J = 9.4\text{ Hz}$ , 2H), 8.06 (dd,  $J = 3.2\text{ Hz}$  and  $5.6\text{ Hz}$ , 2H).  $^{13}\text{C}$  NMR (100 MHz,  $\text{CDCl}_3$ ,  $\delta$ ):  $^{13}\text{C}$ NMR (100 MHz,  $\text{CDCl}_3$ ,  $\delta$ ): 11.3 (CH), 18.6 ( $\text{CH}_3$ ), 67.8 (C), 89.5 (C), 108.9 (C), 116.1 (dd,  $J = 7.1\text{ Hz}$  and  $12.9\text{ Hz}$ , CH), 126.8 (CH), 129.3 (CH), 135.2 (t,  $J = 4.3\text{ Hz}$ , C), 137.5 (C), 150.5 (dd,  $J = 14.6\text{ Hz}$  and  $249.9\text{ Hz}$ , CF). MS-EI ( $m/z$ ):  $[\text{M}+\text{Cl}]^+$  calcd for  $\text{C}_{36}\text{H}_{50}\text{O}_2\text{ClF}_2\text{Si}_2$ , 643.30114; found, 643.30112.

### 2.2 Synthesis of 3c

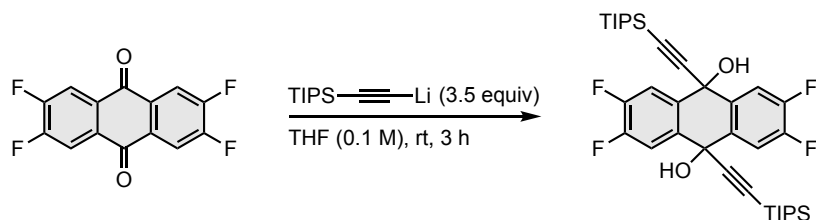

At  $-78\text{ }^{\circ}\text{C}$ , under a nitrogen atmosphere, *n*-BuLi in hexanes (1.55 M, 11.6 mL, 17.9 mmol) was added to a solution of TIPS-acetylene (4.13 mL, 3.36 g, 18.4 mmol) in THF (0.5 M). The mixture was allowed to stir for 15 min before being transferred slowly via cannula into a suspension of **2c** (1.3 g, 4.6 mmol) in THF (0.5 M). The resulting suspension was stirred for 3 h. After reaction, water was added, the

organic layer was taken, and the aqueous phase extracted with  $\text{CH}_2\text{Cl}_2$  ( $2 \times 50$  mL). The combined organic phases were dried  $\text{MgSO}_4$  and taken to dryness under reduced pressure to give a solid residue. The crude material was purified by silica column using hexane/ $\text{Et}_2\text{O}$  (4:1) as an eluent provided the desired product **3c** (1.6 g, 54%).  $^1\text{H}$  NMR (400 MHz,  $\text{CDCl}_3$ ,  $\delta$ ): 1.00-1.10 (m, 42H), 2.92 (s, 2H), 7.86 (t,  $J = 9.4$  Hz, 4H).  $^{13}\text{C}$  NMR (100 MHz,  $\text{CDCl}_3$ ,  $\delta$ ):  $^{13}\text{C}$ NMR (100 MHz,  $\text{CDCl}_3$ ,  $\delta$ ): 11.2 (CH), 18.7 ( $\text{CH}_3$ ), 67.3 (C), 90.5 (C), 108.0 (C), 116.2 (dd,  $J = 7.2$  Hz and 12.8 Hz, CH), 134.8 (t,  $J = 4.5$  Hz, C), 150.6 (dd,  $J = 14.6$  Hz and 250.6 Hz, CH). MS-EI (m/z):  $[\text{M}+\text{Cl}]^+$  calcd for  $\text{C}_{36}\text{H}_{48}\text{O}_2\text{ClF}_4\text{Si}_2$ , 679.28230; found, 679.28257.

### 2.3 Synthesis of 4b

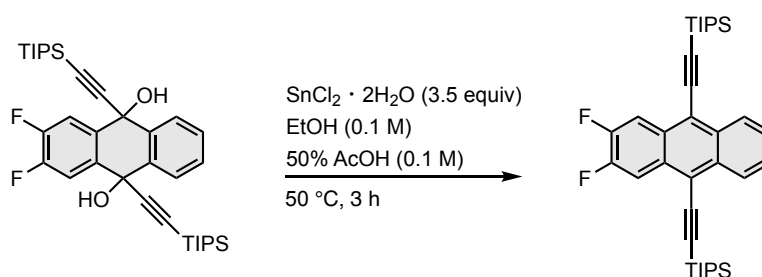

**3b** (1.4 g, 2.3 mmol) was dissolved in ethanol (0.1 M) in one-neck 200 mL flask and a solution of  $\text{SnCl}_2 \cdot 2\text{H}_2\text{O}$  (2.8 g, 8.0 mmol) in 50% v/v AcOH aq. (0.1 M) was added dropwise. Once addition was complete, the suspension was stirred  $50^\circ\text{C}$  for 3 h. The reaction mixture was cooled to room temperature, and the precipitate was isolated by filtration washed with water and ethanol then dried thoroughly in vacuo. The crude material was purified by silica column using hexanes as an eluent provided the desired product **4b** (1.1 g, 82%).  $^1\text{H}$  NMR (400 MHz,  $\text{CDCl}_3$ ,  $\delta$ ): 1.23-1.35 (m, 42H), 7.61 (dd,  $J = 3.2$  Hz and 6.8 Hz, 2H), 8.32 (t,  $J = 10.0$  Hz, 2H), 8.57 (dd,  $J = 3.2$  Hz and 6.8 Hz, 2H).  $^{13}\text{C}$ NMR (100 MHz,  $\text{CDCl}_3$ ,  $\delta$ ): 11.6 (CH), 19.0 ( $\text{CH}_3$ ), 102.8 (C), 105.8 (C), 112.9 (dd,  $J = 6.2$  Hz and 13.4 Hz, CH), 118.5 (C), 127.2 (CH), 127.4 (CH), 129.8 (t,  $J = 4.0$  Hz, C), 132.5 (C), 151.3 (dd,  $J = 18.6$  Hz and 253.5 Hz, CF). MS-EI (m/z):  $[\text{M}+\text{H}]^+$  calcd for  $\text{C}_{36}\text{H}_{49}\text{F}_2\text{Si}_2$ , 575.33354; found, 575.33345.

## 2.4 Synthesis of 4c

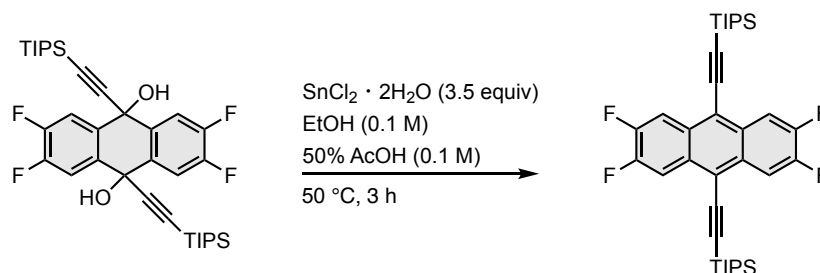

**3c** (1.6 g, 2.5 mmol) was dissolved in ethanol (0.1 M) in one-neck 200 mL flask and a solution of  $\text{SnCl}_2 \cdot 2\text{H}_2\text{O}$  (3.0 g, 13 mmol) in 50% v/v AcOH aq. (0.1 M) was added dropwise. Once addition was complete, the suspension was stirred 50 °C for 3 h. The reaction mixture was cooled to room temperature, and the precipitate was isolated by filtration washed with water and ethanol then dried thoroughly in vacuo. The crude material was purified by silica column using hexanes as an eluent provided the desired product **4c** (1.3 g, 83%).  $^1\text{H}$  NMR (400 MHz,  $\text{CDCl}_3$ ,  $\delta$ ): 1.23-1.54 (m, 42H), 8.26 (t,  $J = 9.8$  Hz, 4H).  $^{13}\text{C}$  NMR (100 MHz,  $\text{CDCl}_3$ ,  $\delta$ ): 11.6 (CH), 19.0 ( $\text{CH}_3$ ), 102.1 (C), 106.7 (C), 112.8-113.0 (m, CH), 118.0 (C), 129.8 (br, C), 151.6 (dd,  $d = 18.9$  Hz and 254.7 Hz, CF). MS-EI ( $m/z$ ):  $[\text{M}+\text{H}]^+$  calcd for  $\text{C}_{36}\text{H}_{46}\text{F}_4\text{Si}_2$ , 611.31469; found, 611.31427.

## 2.5 Synthesis of 5b

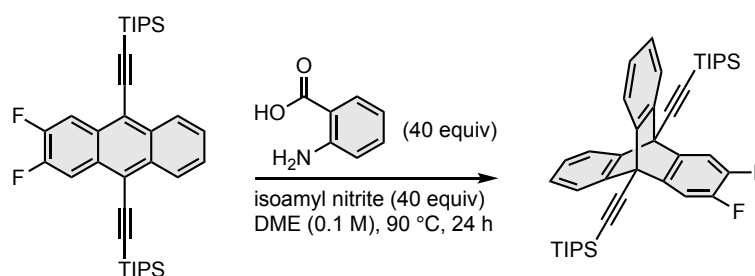

**4b** (1.48 g, 2.57 mmol) was dissolved in anhydrous 1,2-dimethoxyethane (130 mL) in a 3-neck flask equipped with two dropping funnels and condenser. The solution was heated to 100 °C and then a solution of anthranilic acid (14.3 g, 104 mmol) and iso-amyl nitrite (12.3 g, 13.8 mL, 104 mmol) in anhydrous 1,2-dimethoxyethane (65 mL) were slowly added via additional funnels over a period of 1.5 h. The reaction mixture was heated to 90 °C for additional 24 h before being cooled to room temperature. The solvent was removed under reduced pressure, and the residue was purified by silica gel column chromatography (hexane as eluent) to afford **5b** (0.69 g, 41% yield).  $^1\text{H}$  NMR (400 MHz,

CDCl<sub>3</sub>,  $\delta$ ): 1.23-1.39 (m, 42H), 7.12 (dd,  $J = 3.2$  Hz and 5.6 Hz, 4H), 7.55 (t,  $J = 8.6$  Hz, 2H), 7.74 (dd,  $J = 3.4$  Hz and 5.4 Hz, 4H). <sup>13</sup>C NMR (100 MHz, CDCl<sub>3</sub>,  $\delta$ ): 11.6 (CH), 19.0 (CH<sub>3</sub>), 53.0 (C), 94.9 (C), 100.7 (C), 112.6 (dd,  $J = 7.6$  Hz, 13.4 Hz, CH), 122.5 (CH), 126.2 (CH), 140.6 (t,  $J = 4.3$  Hz, C), 143.3 (C), 148.1 (dd,  $J = 14.8$  Hz and 246.8 Hz, CF). MS-EI ( $m/z$ ): [M+H]<sup>+</sup> calcd for C<sub>42</sub>H<sub>53</sub>F<sub>2</sub>Si<sub>2</sub>, 651.36484; found, 651.36479.

## 2.6 Synthesis of 5c

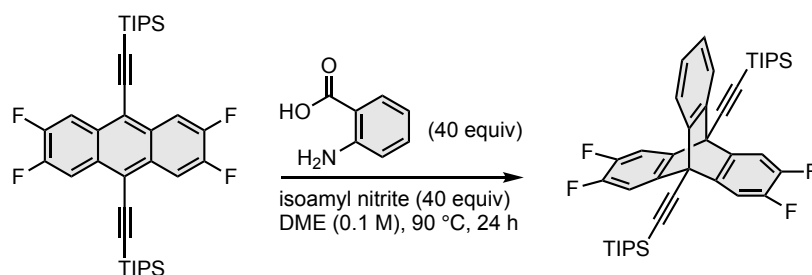

**4c** (1.8 g, 3.0 mmol) was dissolved in anhydrous 1,2-dimethoxyethane (150 mL) in a 3-neck flask equipped with two dropping funnels and condenser. The solution was heated to 100 °C and then a solution of anthranilic acid (16.5 g, 120 mmol) and iso-amyl nitrite (14.0 g, 16.0 mL, 120 mmol) in anhydrous 1,2-dimethoxyethane (75 mL) were slowly added via additional funnels over a period of 1.5 h. The reaction mixture was heated to 90 °C for additional 24 h before being cooled to room temperature. The solvent was removed under reduced pressure, and the residue was purified by silica gel column chromatography (hexane as eluent) to afford **5b** (0.30 g, 14% yield). <sup>1</sup>H NMR (400 MHz, CDCl<sub>3</sub>,  $\delta$ ): 1.26-1.37 (m, 42H), 7.15 (dd,  $J = 3.2$  Hz and 5.6 Hz, 2H), 7.53 (t,  $J = 8.4$  Hz, 4H), 7.72 (dd,  $J = 3.2$  Hz and 5.6 Hz, 2H). <sup>13</sup>C NMR (100 MHz, CDCl<sub>3</sub>,  $\delta$ ): 11.5 (CH), 19.0 (CH<sub>3</sub>), 52.5 (C), 95.5 (C), 99.8 (C), 112.7 (dd,  $J = 7.6$  Hz, 13.4 Hz, CH), 122.5 (CH), 126.5 (CH), 140.0 (t,  $J = 4.5$  Hz, C), 142.7 (C), 148.1 (dd,  $J = 14.6$  Hz and 247.5 Hz, CF). MS-EI ( $m/z$ ): [M]<sup>+</sup> calcd for C<sub>42</sub>H<sub>50</sub>F<sub>4</sub>Si<sub>2</sub>, 686.33817; found, 686.33802.

## 2.7 Synthesis of 1b

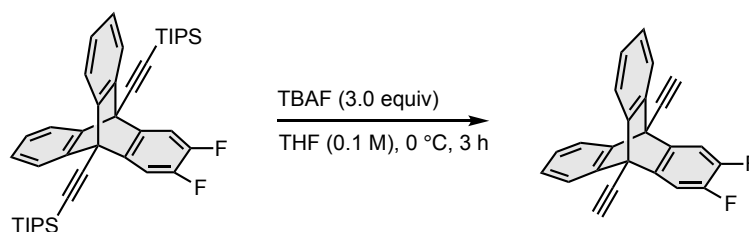

**5b** (2.06 g, 3.17 mmol) was dissolved in anhydrous THF (0.1 M) at 0 °C and TBAF (1.0 M solution in THF, 9.5 mL) was added dropwise. The reaction mixture was stirred in an ice bath at 0 °C for 3 h, and then quenched by the additional of saturated NH<sub>4</sub>Cl solution. The product was extracted with CH<sub>2</sub>Cl<sub>2</sub> (3×30 mL). The combined organic layers were dried over anhydrous MgSO<sub>4</sub> and concentrated under reduced pressure to afford a pale-orange residue. Purification by silica gel column chromatography (hexane as eluent) gave **1b** (0.61 g, 57%). <sup>1</sup>H NMR (400 MHz, CDCl<sub>3</sub>, δ): 3.31 (s, 2H), 7.14 (dd, *J* = 3.2 and 5.6 Hz, 4H), 7.57 (t, *J* = 8.8 Hz, 2H), 7.74 (dd, *J* = 3.2 Hz and 5.6 Hz, 4H). <sup>13</sup>C NMR (100 MHz, CDCl<sub>3</sub>, δ): 51.8 (C), 77.5 (CH), 81.4 (C), 112.5 (dd, *J* = 7.7 Hz and 13.3 Hz, CH), 122.4 (CH), 126.3 (CH), 139.9 (t, *J* = 4.5 Hz, C), 148.1 (dd, *J* = 14.6 Hz and 247.0 Hz). MS-EI (m/z): [M]<sup>+</sup> calcd for C<sub>24</sub>H<sub>12</sub>F<sub>2</sub>, 338.09016; found, 338.09003. Element analysis (calcd for C<sub>24</sub>H<sub>12</sub>F<sub>2</sub> C, 85.20; H, 3.57; Found: C, 85.20; H, 3.57).

## 2.8 Synthesis of 1c

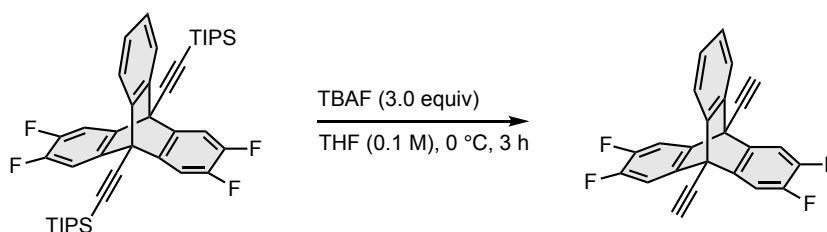

**5c** (0.30 g, 0.43 mmol) was dissolved in anhydrous THF (0.1 M) at 0 °C and TBAF (1.0 M solution in THF, 1.3 mL) was added dropwise. The reaction mixture was stirred in an ice bath at 0 °C for 3 h, and then quenched by the additional of saturated NH<sub>4</sub>Cl solution. The product was extracted with CH<sub>2</sub>Cl<sub>2</sub> (3×30 mL). The combined organic layers were dried over anhydrous MgSO<sub>4</sub> and concentrated under reduced pressure to afford a pale-orange residue. Purification by silica gel column chromatography (hexane as eluent) gave **1c** (0.61 g, 43%). <sup>1</sup>H NMR (400 MHz, CDCl<sub>3</sub>, δ): 3.34 (s, 2H), 7.16 (dd, *J* = 3.2 and 5.6 Hz, 2H), 7.55 (t, *J* = 8.6 Hz, 4H), 7.72 (dd, *J* = 3.2 Hz and 5.6 Hz, 2H). <sup>13</sup>C NMR (100 MHz, CDCl<sub>3</sub>, δ): 51.2 (C), 76.8 (CH), 81.8 (C), 112.6 (dd, *J* = 7.6 Hz and 13.4 Hz, CH), 122.5 (CH),

126.6 (CH), 139.3 (t,  $J = 4.8$  Hz, C), 148.2 (dd,  $J = 14.5$  Hz and 248.1 Hz). MS-EI (m/z):  $[M]^+$  calcd for C<sub>24</sub>H<sub>10</sub>F<sub>4</sub>, 374.07131; found, 374.07116. Element analysis (calcd for C<sub>24</sub>H<sub>10</sub>F<sub>4</sub> C, 85.20; H, 3.57; Found: C, 85.35; H, 3.94).

### 3. Thermogravimetric Analysis (TGA) of Crystals 1a, 1b and 1c

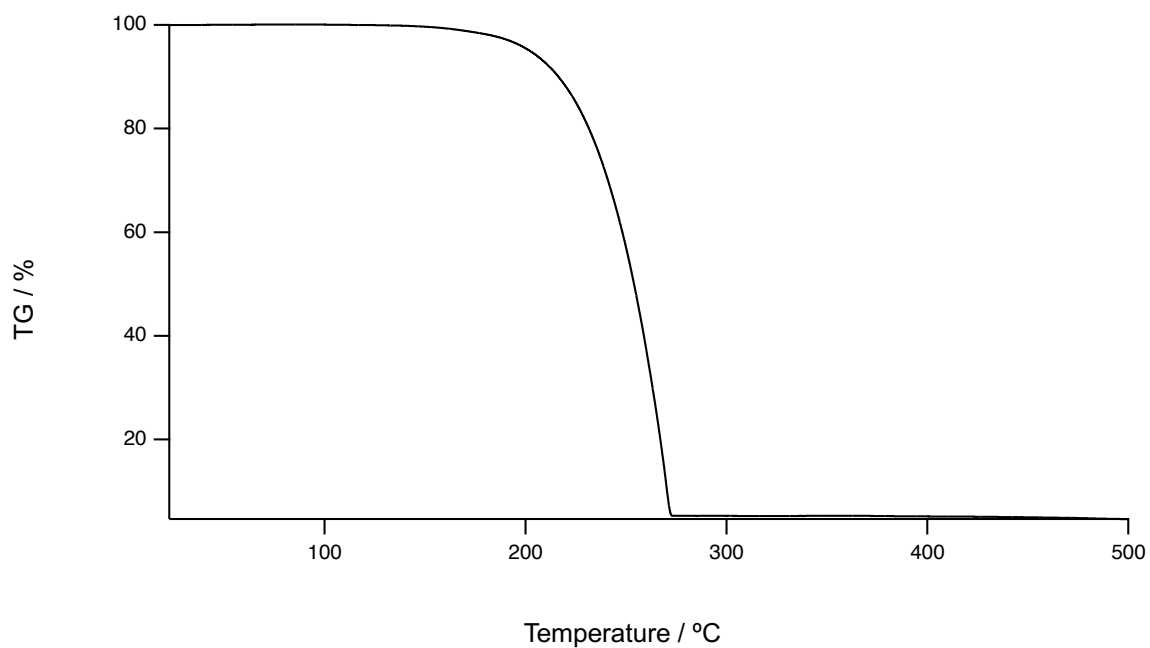

**Fig. S1.** TGA profiles of the crystal **1a**. The heating rate is 5 °C/min.

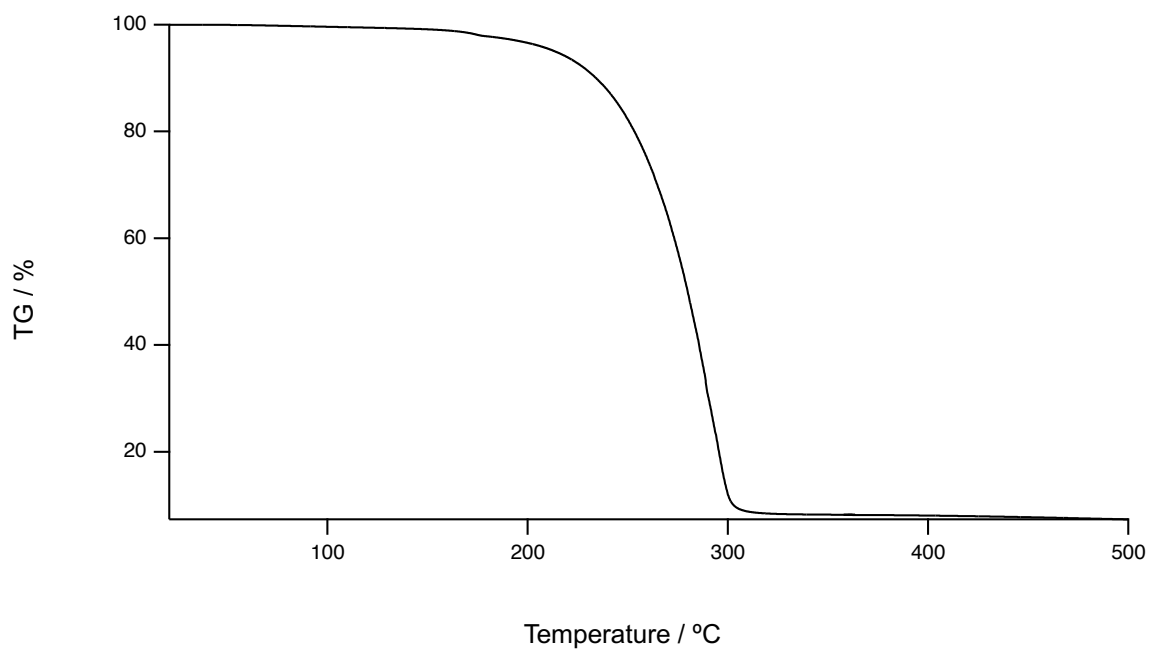

**Fig. S2.** TGA profiles of the crystal **1b**. The heating rate is 5 °C/min.

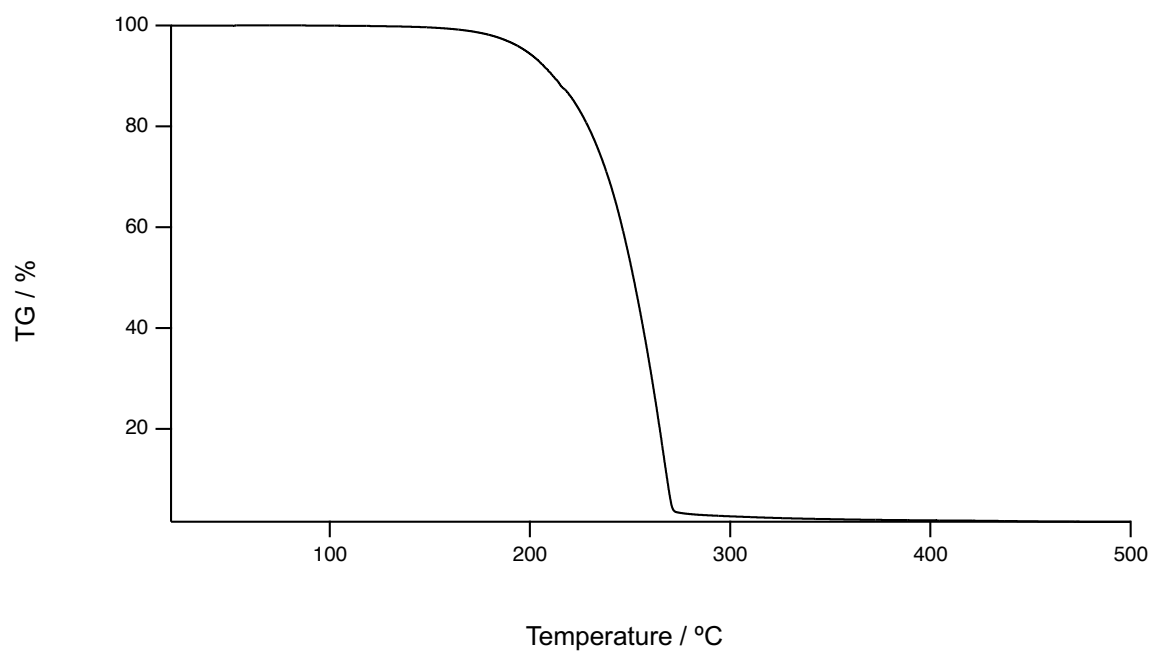

**Fig. S3.** TGA profiles of the crystal **1c**. The heating rate is 5 °C/min.

#### 4. Differential Scanning Calorimetry (DSC) of Crystal 1a, 1b and 1c

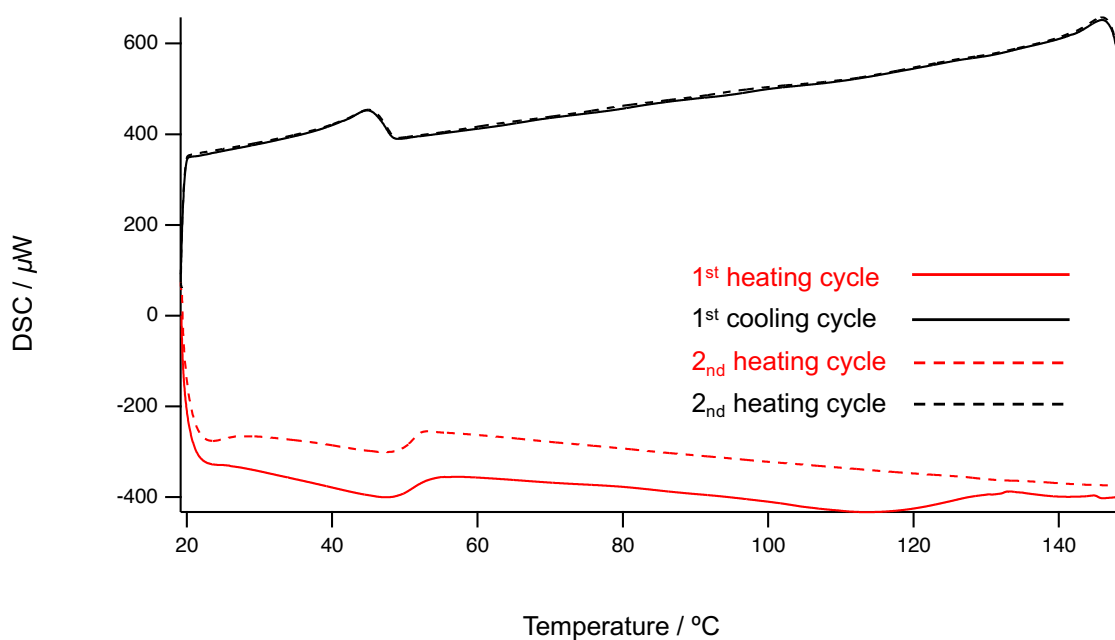

**Fig. S4.** DSC profiles of the crystal **1a**. Heating and cooling rates were 5  $^{\circ}\text{C}/\text{min}$ .

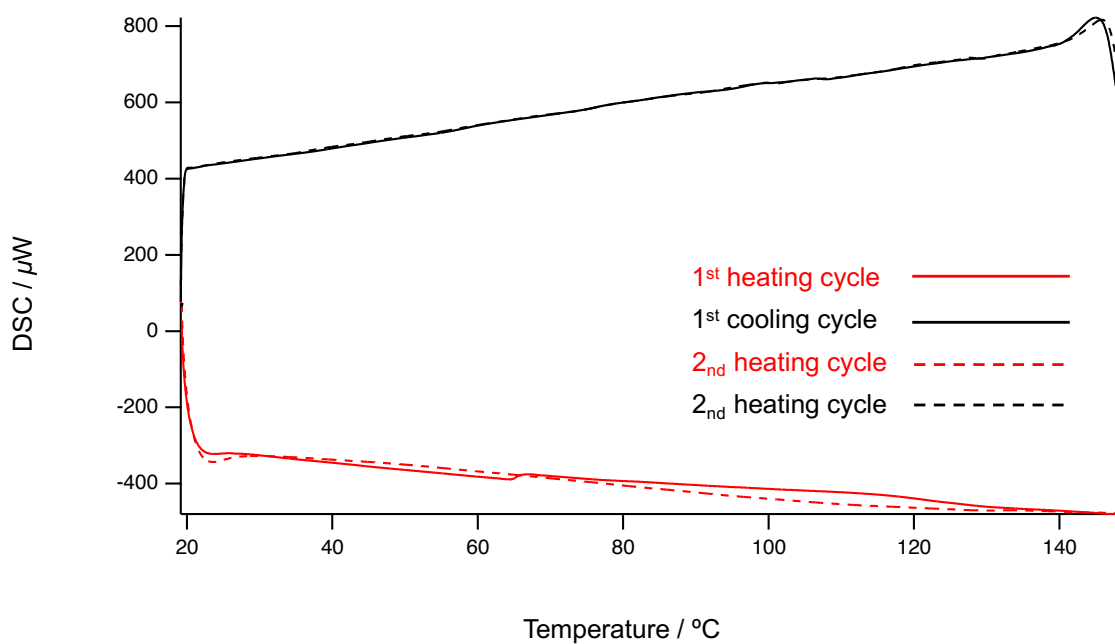

**Fig. S5.** DSC profiles of the crystal **1b**. Heating and cooling rates were 5  $^{\circ}\text{C}/\text{min}$ .

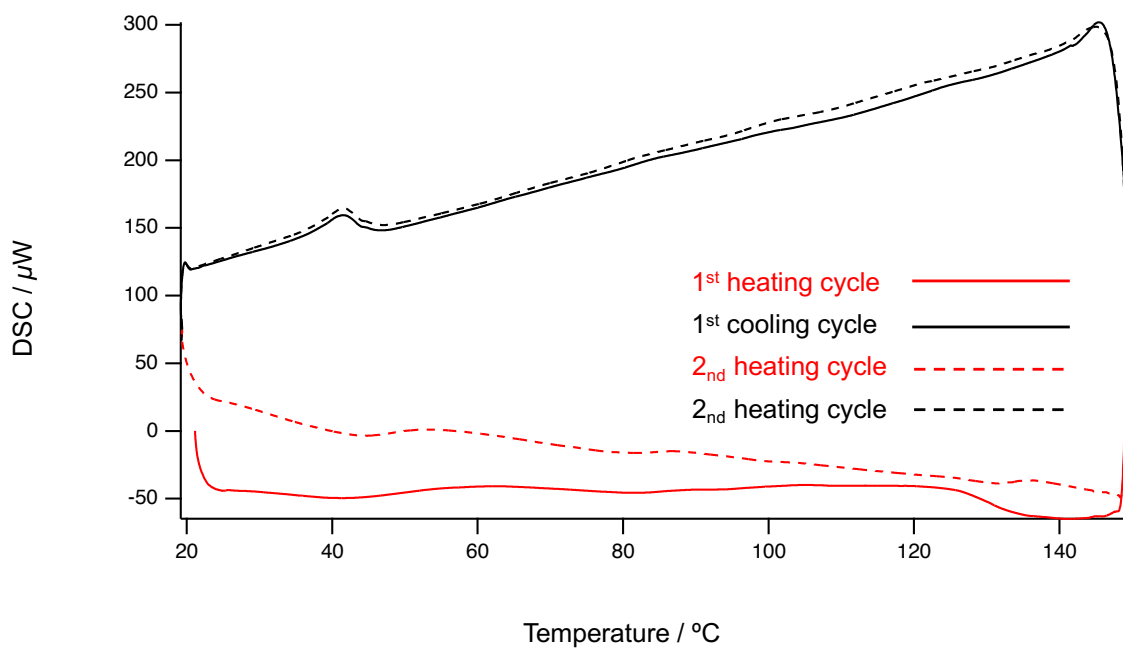

**Fig. S6.** DSC profiles of the crystal **1c**. Heating and cooling rates were 5  $^{\circ}\text{C}/\text{min}$ .

## 5. Single-Crystal X-Ray Structural Analyses

Single-crystal X-ray structural analyses were carried out on a Rigaku XtaLAB PRO MM007 diffractometer using graphite monochromated Cu-K $\alpha$  radiation. The structures were solved using intrinsic phasing as implemented in the SHELXT program and refined by full-matrix least-squares on F<sup>2</sup> using SHELXL within the OLEX2 program package.<sup>2</sup> Non-hydrogen atoms were refined anisotropically. Hydrogen atoms were refined using the riding model.

| compound                                      | 1a                                                              | 1b                                                               | 1c (P4 <sub>1</sub> )                                           | 1c (P4 <sub>3</sub> )                                          |
|-----------------------------------------------|-----------------------------------------------------------------|------------------------------------------------------------------|-----------------------------------------------------------------|----------------------------------------------------------------|
| CCDC Number                                   | 2493853                                                         | 2493852                                                          | 2493850                                                         | 2493851                                                        |
| Empirical Formula                             | C <sub>24</sub> H <sub>14</sub>                                 | C <sub>24</sub> H <sub>12</sub> F <sub>2</sub>                   | C <sub>24</sub> H <sub>10</sub> F <sub>4</sub>                  | C <sub>24</sub> H <sub>10</sub> F <sub>4</sub>                 |
| Formula Weight                                | 302.35                                                          | 338.34                                                           | 374.32                                                          | 374.32                                                         |
| Crystal System                                | monoclinic                                                      | monoclinic                                                       | tetragonal                                                      | tetragonal                                                     |
| Crystal Size / mm                             | 0.05×0.05×0.05                                                  | 0.05×0.05×0.05                                                   | 0.05×0.05×0.05                                                  | 0.01×0.01×0.01                                                 |
| <i>a</i> / Å                                  | 8.11040(1)                                                      | 8.20240(1)                                                       | 13.4142(6)                                                      | 13.5057(5)                                                     |
| <i>b</i> / Å                                  | 27.2387(3)                                                      | 32.5749(3)                                                       | 13.4142(6)                                                      | 13.5057(5)                                                     |
| <i>c</i> / Å                                  | 8.34000(1)                                                      | 13.25110(1)                                                      | 9.5889(7)                                                       | 9.6580(6)                                                      |
| $\alpha$ / °                                  | 90                                                              | 90                                                               | 90                                                              | 90                                                             |
| $\beta$ / °                                   | 116.276(2)                                                      | 101.794(1)                                                       | 90                                                              | 90                                                             |
| $\gamma$ / °                                  | 90                                                              | 90                                                               | 90                                                              | 90                                                             |
| <i>V</i> / Å <sup>3</sup>                     | 1652.07(4)                                                      | 3465.85(6)                                                       | 1725.4(2)                                                       | 1761.66(17)                                                    |
| Space Group                                   | <i>Cc</i>                                                       | <i>P21/c</i>                                                     | <i>P4</i> <sub>1</sub>                                          | <i>P4</i> <sub>3</sub>                                         |
| <i>Z</i> value                                | 4                                                               | 8                                                                | 4                                                               | 4                                                              |
| <i>D</i> <sub>calc</sub> / g cm <sup>-3</sup> | 1.216                                                           | 1.297                                                            | 1.441                                                           | 1.411                                                          |
| Temperature / K                               | 293                                                             | 293                                                              | 153                                                             | 293                                                            |
| 2 $\theta$ <sub>max</sub> / °                 | 151.276                                                         | 68.56                                                            | 155.938                                                         | 149.406                                                        |
| $\mu$ / mm <sup>-1</sup>                      | 0.525                                                           | 0.100                                                            | 0.964                                                           | 0.944                                                          |
| No. of Reflections                            | Total: 15033<br>Unique:2997<br><i>R</i> <sub>int</sub> = 0.0231 | Total: 31556<br>Unique:10742<br><i>R</i> <sub>int</sub> = 0.0566 | Total: 16038<br>Unique:3500<br><i>R</i> <sub>int</sub> = 0.0609 | Total: 8939<br>Unique:3435<br><i>R</i> <sub>int</sub> = 0.0371 |
| <i>R</i> <sub>1</sub> <sup>a</sup>            | 0.0285                                                          | 0.0624                                                           | 0.0524                                                          | 0.0522                                                         |
| <i>wR</i> <sub>2</sub> <sup>b</sup>           | 0.0783                                                          | 0.1845                                                           | 0.1341                                                          | 0.1642                                                         |
| GOF <sup>c</sup>                              | 1.073                                                           | 1.040                                                            | 1.071                                                           | 1.091                                                          |
| Flack Parameter                               | -0.2(5)                                                         |                                                                  | -0.06(15)                                                       | -0.1(3)                                                        |
| Max./Mini. peak <i>I</i> <sup>d</sup> / Å     | 0.13 e <sup>-</sup> /-0.11 e <sup>-</sup>                       | 0.35 e <sup>-</sup> /-0.30 e <sup>-</sup>                        | 0.24 e <sup>-</sup> /-0.27 e <sup>-</sup>                       | 0.18 e <sup>-</sup> /-0.15 e <sup>-</sup>                      |

<sup>a</sup>:  $I > 2.00\sigma(I)$ . <sup>b</sup>: All reflections. <sup>c</sup>: Goodness of Fit Indicator.

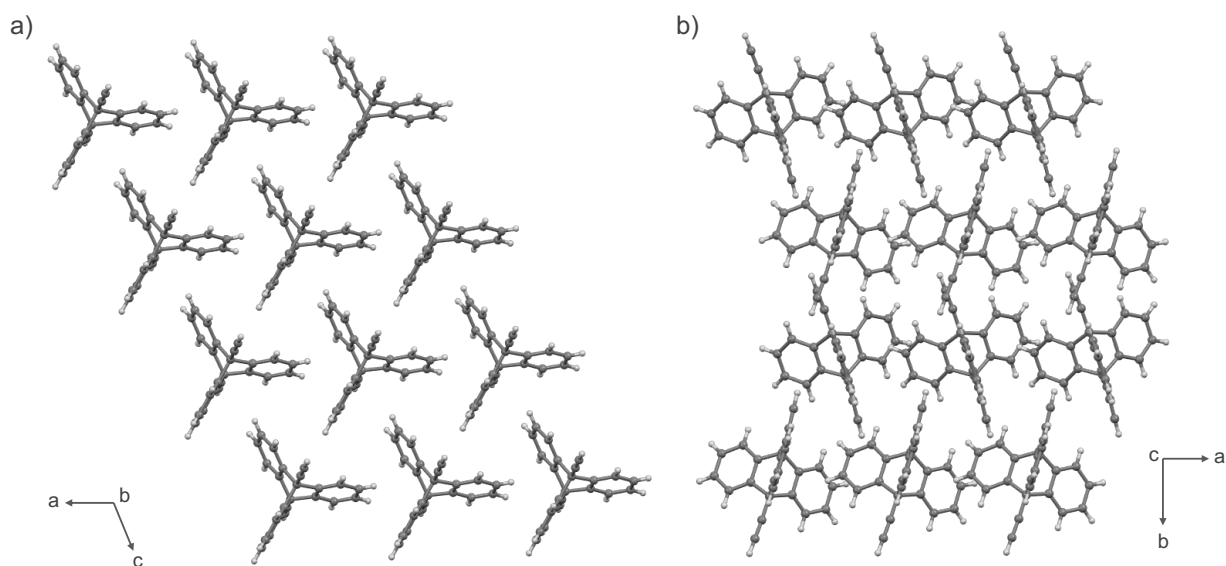

**Figure S7.** Crystal structure of **1a**. a) The two-dimensional intermeshed structure extending along the  $ac$  plane. b) The intermeshed layers stack in a zigzag fashion along the  $b$  direction.

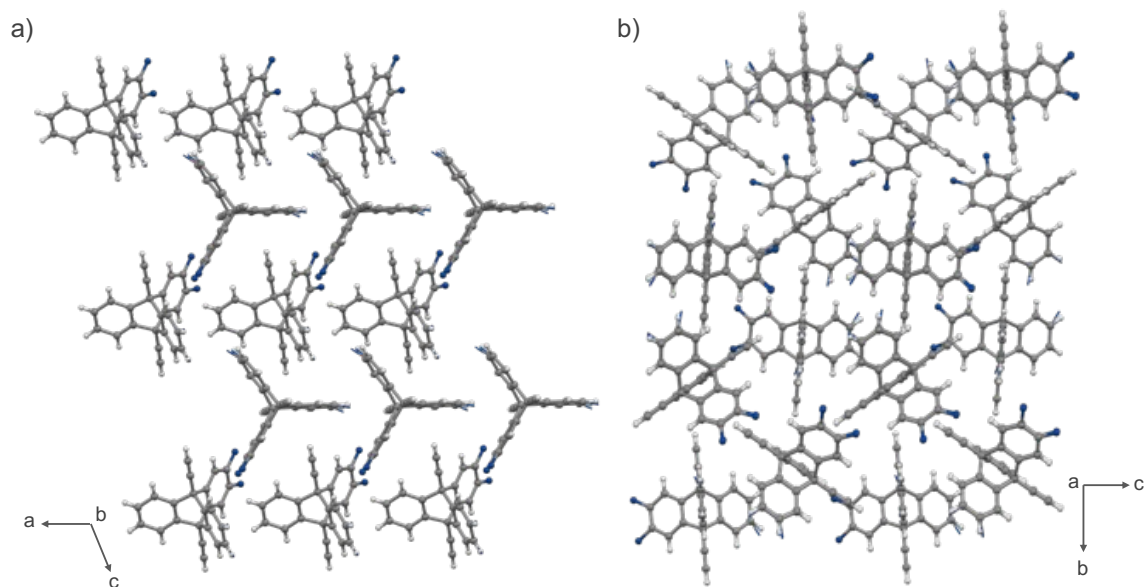

**Figure S8.** Crystal structure of **1b**. a) The one-dimensional intermeshed structure extending along the  $ac$  plane. b) The intermeshed layers stack along the  $b$  direction.

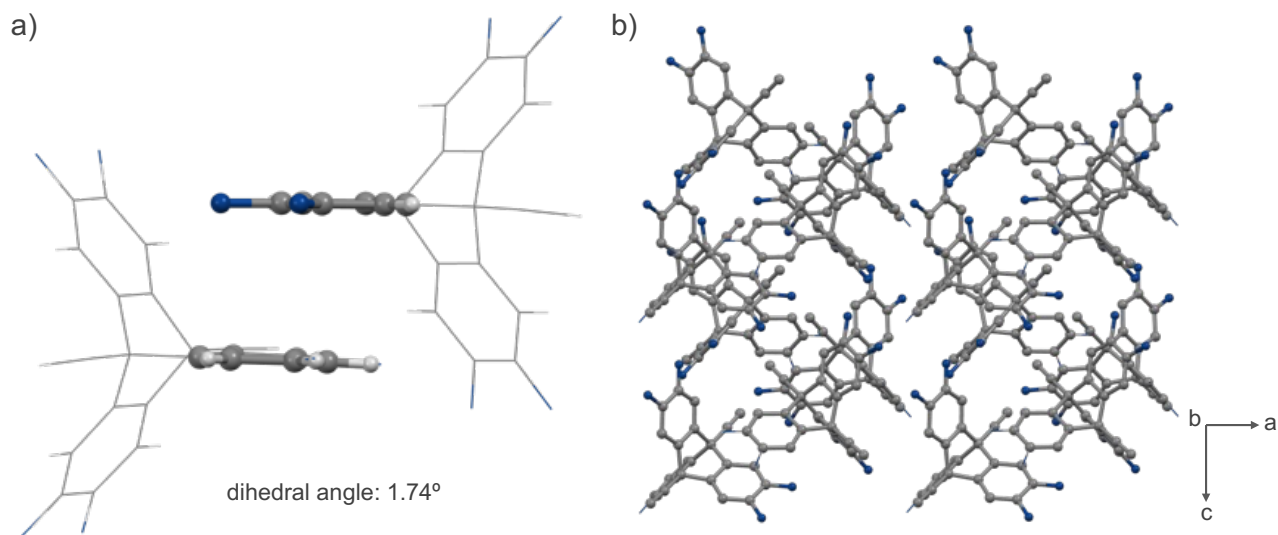

**Figure S9.** Crystal structure of **1c** ( $P4_1$ ). a)  $\pi$ - $\pi$  stacking interaction between the phenylene and fluoro-phenylene units, showing the dihedral angle between their aromatic planes. b) Packing structure between the helical columns of **1c** ( $P4_1$ ). Adjacent columns possess the same helical handedness, and thus the molecular dipoles are not canceled out.

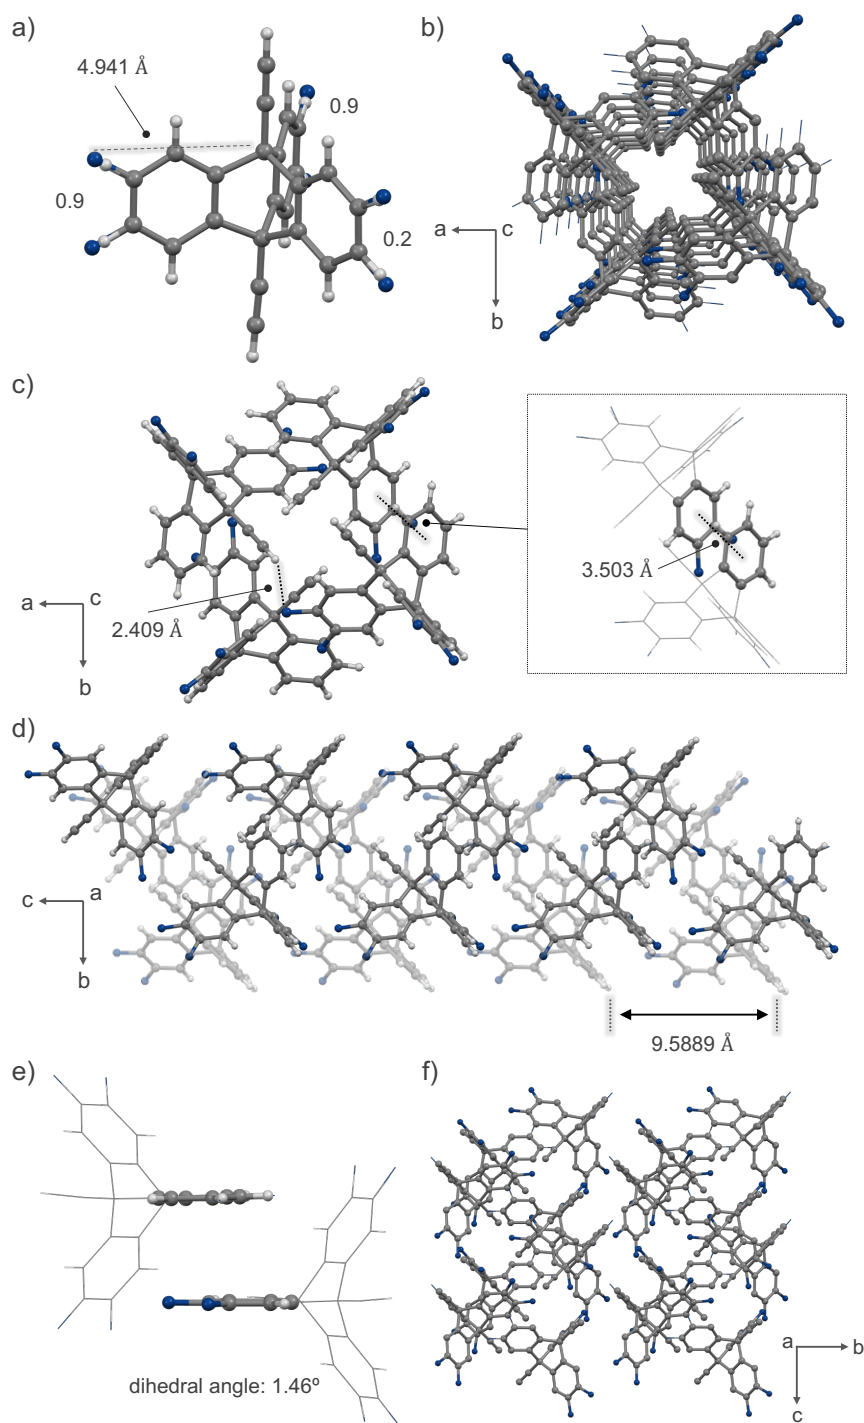

**Figure S10.** Crystal structure of **1c** ( $P4_3$ ). (a) monomer structure. (b) top view and (c) side view of P-helicity of the 4-fold helical structure; (d) observed  $\pi$ - $\pi$  interaction and H...F close contact. (e)  $\pi$ - $\pi$  stacking interaction between the phenylene and fluoro-phenylene units, showing the dihedral angle between their aromatic planes. (f) Packing structure between the helical columns of **1c** ( $P4_3$ ). Adjacent columns possess the same helical handedness, and thus the molecular dipoles are not canceled out.

## 6. DFT calculations

All the calculations were performed at the DFT level of theory with the B3LYP hybrid functional<sup>3</sup> as implemented in Gaussian 16.<sup>4</sup> To describe the dispersion properly, the D3 version of Grimme's dispersion with the Becke-Johnson damping<sup>5</sup> was employed in the DFT calculations. The Pople-style 6-311+G(d,p) basis sets were used for the geometry optimization.<sup>6</sup> The geometries of the tetramers were taken from the single crystal structures of **1a**, **1b**, and **1c**.

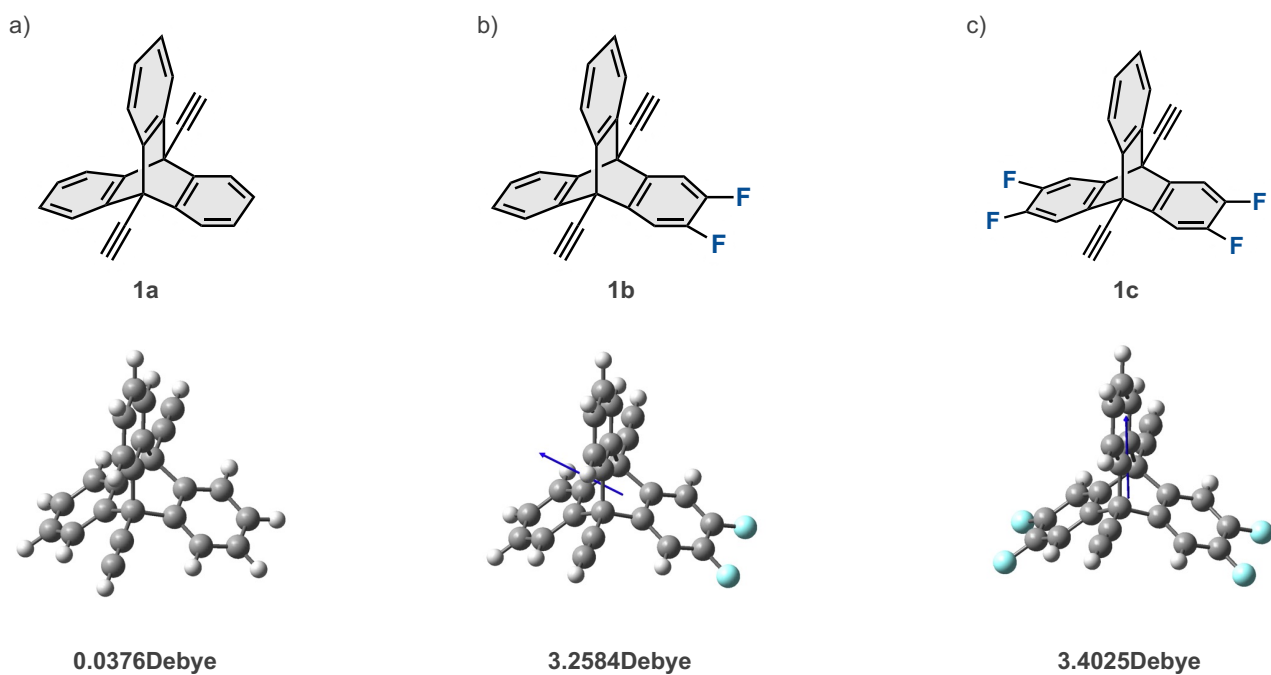

**Figure S11.** The dipole moments of the monomers **1a**, **1b**, and **1c**. Blue arrows indicate the dipole moment vectors obtained from DFT calculations, with the corresponding magnitudes shown in debye.

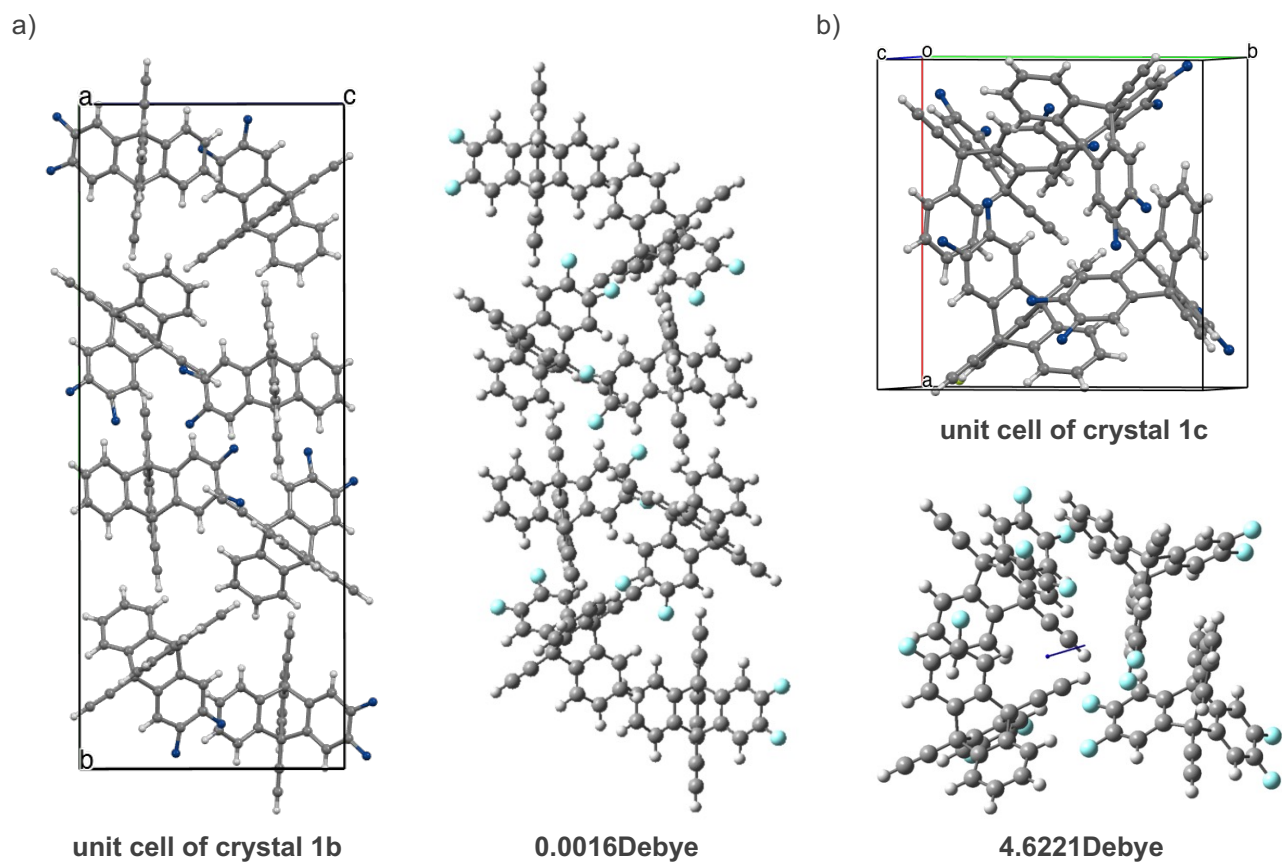

**Figure S12.** The dipole moments of the unit cells **1b**, and **1c**. Blue arrows indicate the dipole moment vectors obtained from DFT calculations, with the corresponding magnitudes shown in debye. Although monomer **1b** possesses a distinct dipole moment, the overall dipole moment cancels out in the crystal unit cell due to its symmetric packing arrangement.

## 7. Analysis of Non-Covalent Interactions of Crystal 1b and 1c

Independent Gradient Model based on Hirshfeld partition (IGMH) analysis of the crystal structures of **1b** and **1c**, performed using the experimental single-crystal X-ray diffraction geometries of their unit cells.<sup>7</sup> For **1b**, no pronounced localized non-covalent interactions are observed, indicating that its crystal packing is not governed by specific directional intermolecular interactions and is instead dominated by isotropic dispersion forces. In contrast, the IGMH analysis of **1c** reveals distinct non-covalent interaction regions corresponding to  $\pi$ - $\pi$  stacking and  $\text{C}\equiv\text{C}-\text{H}\cdots\text{F}$  hydrogen bonding, suggesting that these directional interactions cooperatively contribute to the stabilization of the polar helical packing structure.

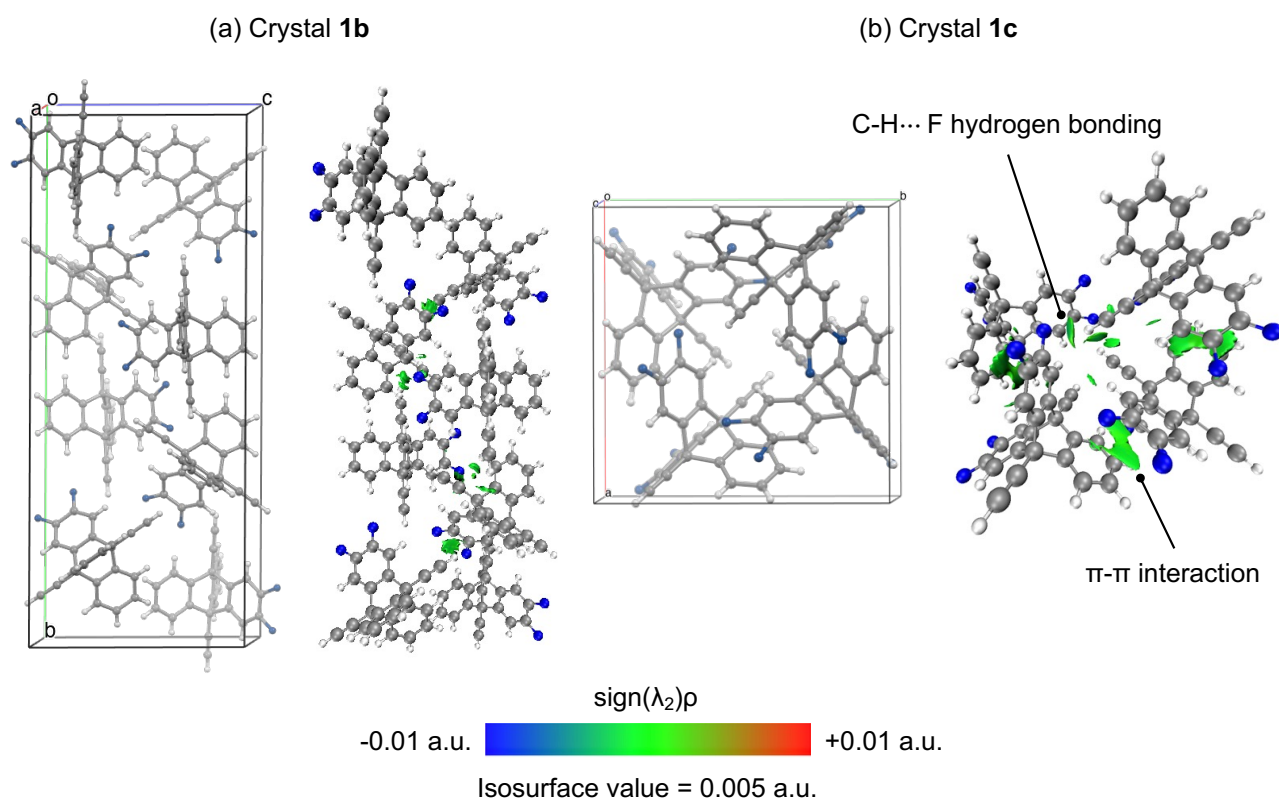

**Figure S13.** Visualization of IGMH analysis ( $\text{sign}(\lambda_2)\rho$  colored isosurfaces of  $\delta g_{\text{inter}}$ ) of unit cell in the crystal structures of (a)**1b** and (b)**1c**.

## **8. Reference**

- 1 O. V. Dolomanov, L. J. Bourhis, R. J. Gildea, J. A. K. Howard and H. Puschmann, *J. Appl. Crystallogr.*, 2009, **42**, 339–341.
- 2 G. M. Sheldrick, *Acta Crystallogr. C Struct. Chem.*, 2015, **71**, 3–8.
- 3 (a) A. D. Becke, *J. Chem. Phys.*, 1993, **98**, 1372–1377. (b) C. Lee, W. Yang and R. G. Parr, *Phys. Rev. B Condens. Matter*, 1988, **37**, 785–789.
- 4 Gaussian 16, Revision C.01, M. J. Frisch, G. W. Trucks, H. B. Schlegel, G. E. Scuseria, M. A. Robb, J. R. Cheeseman, G. Scalmani, V. Barone, G. A. Petersson, H. Nakatsuji, X. Li, M. Caricato, A. V. Marenich, J. Bloino, B. G. Janesko, R. Gomperts, B. Mennucci, H. P. Hratchian, J. V. Ortiz, A. F. Izmaylov, J. L. Sonnenberg, D. Williams-Young, F. Ding, F. Lipparini, F. Egidi, J. Goings, B. Peng, A. Petrone, T. Henderson, D. Ranasinghe, V. G. Zakrzewski, J. Gao, N. Rega, G. Zheng, W. Liang, M. Hada, M. Ehara, K. Toyota, R. Fukuda, J. Hasegawa, M. Ishida, T. Nakajima, Y. Honda, O. Kitao, H. Nakai, T. Vreven, K. Throssell, J. A. Montgomery Jr., J. E. Peralta, F. Ogliaro, M. J. Bearpark, J. J. Heyd, E. N. Brothers, K. N. Kudin, V. N. Staroverov, T. A. Keith, R. Kobayashi, J. Normand, K. Raghavachari, A. P. Rendell, J. C. Burant, S. S. Iyengar, J. Tomasi, M. Cossi, J. M. Millam, M. Klene, C. Adamo, R. Cammi, J. W. Ochterski, R. L. Martin, K. Morokuma, O. Farkas, J. B. Foresman and D. J. Fox, *Gaussian, Inc.*, Wallingford CT, 2016.
- 5 (a) S. Grimme, J. Antony, S. Ehrlich and H. Krieg, *J. Chem. Phys.*, 2010, **132**, 154104. (b) S. Grimme, S. Ehrlich and L. Goerigk, *J. Comput. Chem.*, 2011, **32**, 1456–1465.
- 6 (a) A. D. McLean and G. S. Chandler, *J. Chem. Phys.*, 1980, **72**, 5639–5648. (b) R. Krishnan, J. S. Binkley, R. Seeger and J. A. Pople, *J. Chem. Phys.*, 1980, **72**, 650–654.
- 7 T. Lu and Q. Chen, *J. Comput. Chem.*, 2022, **43**, 539–555.

## 9. NMR spectra

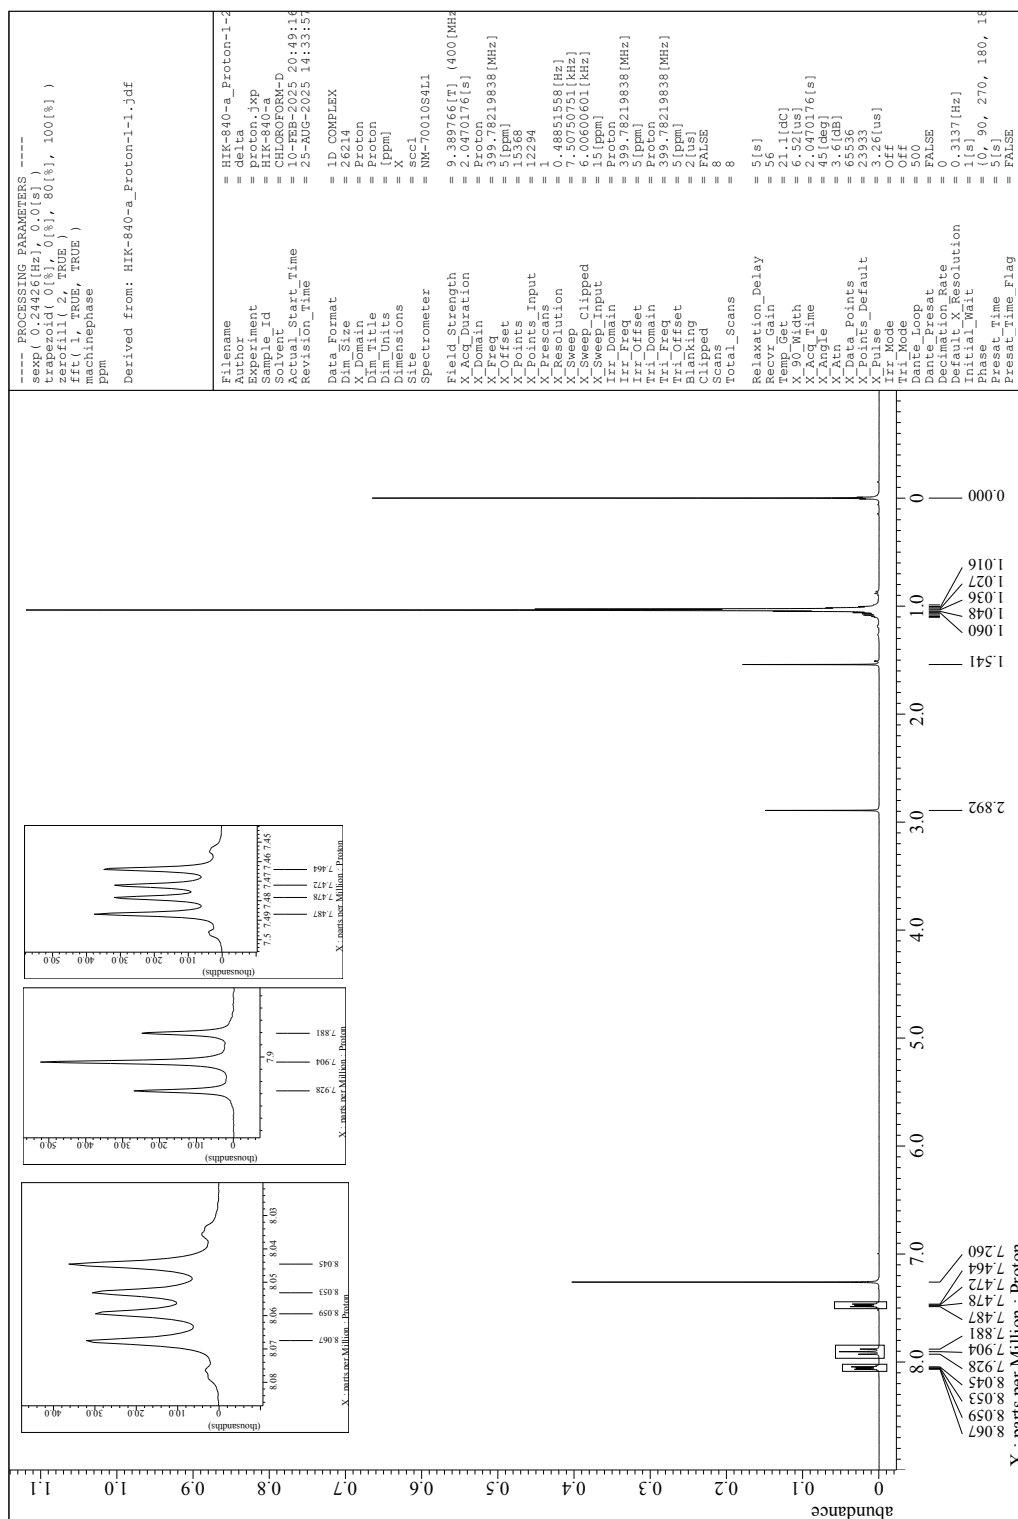

Figure S14.  $^1\text{H}$  NMR spectrum (400 MHz,  $\text{CHCl}_3$ ) of **3b**

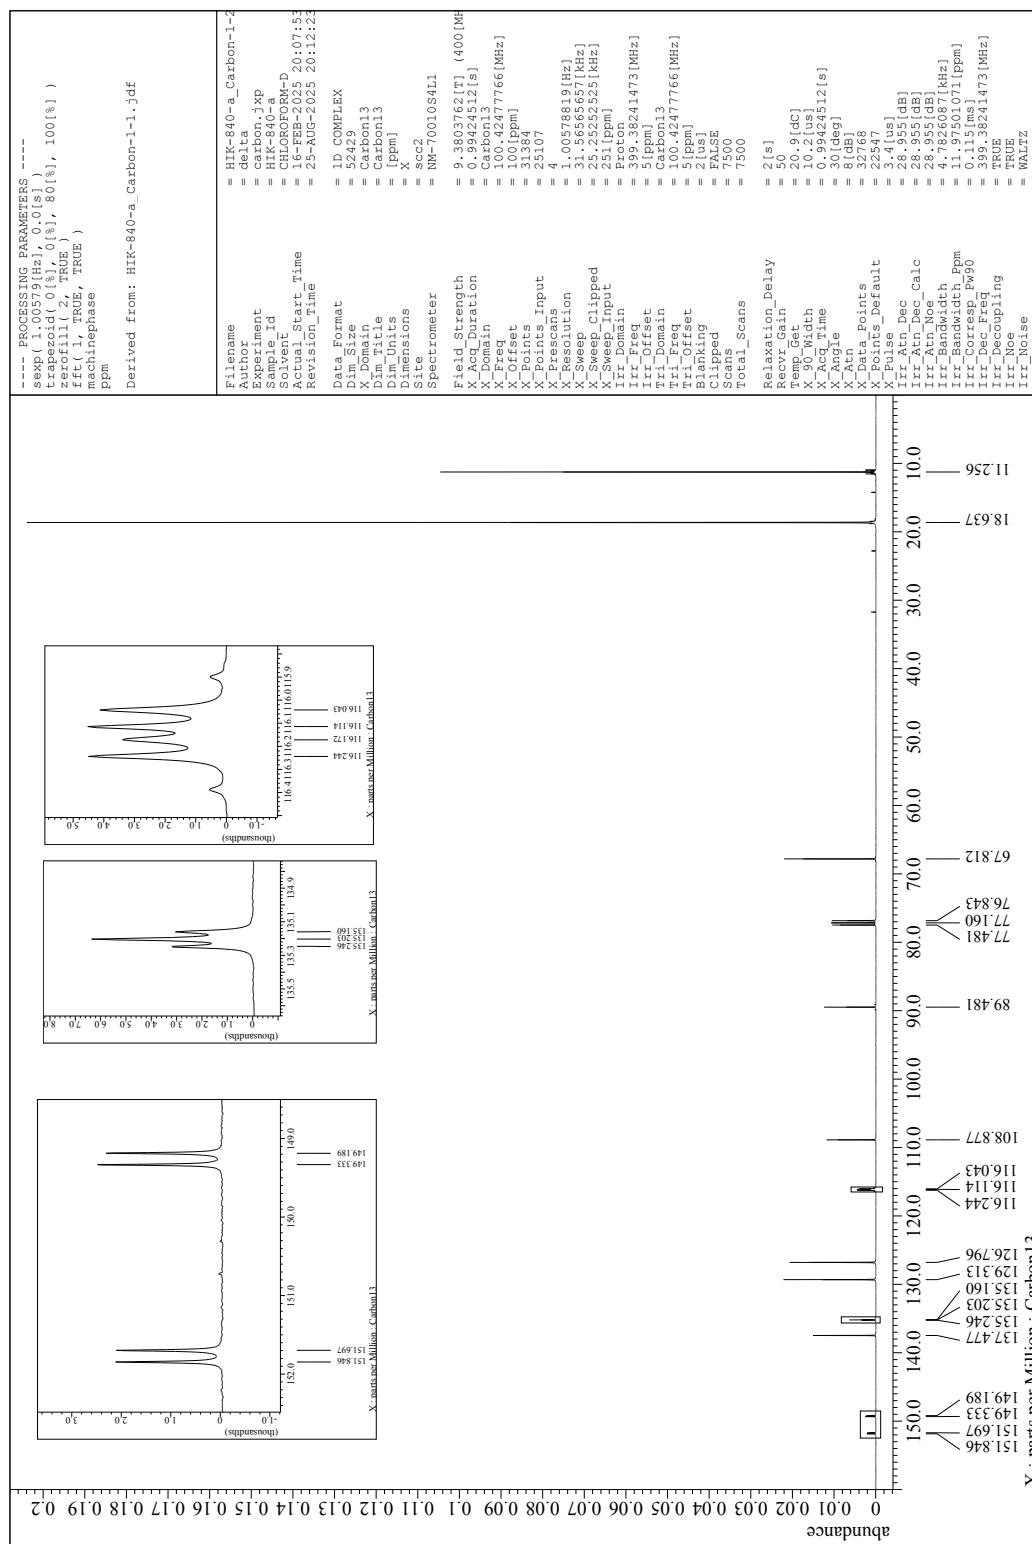

Figure S15. <sup>13</sup>C NMR spectrum (100 MHz, CHCl<sub>3</sub>) of **3b**

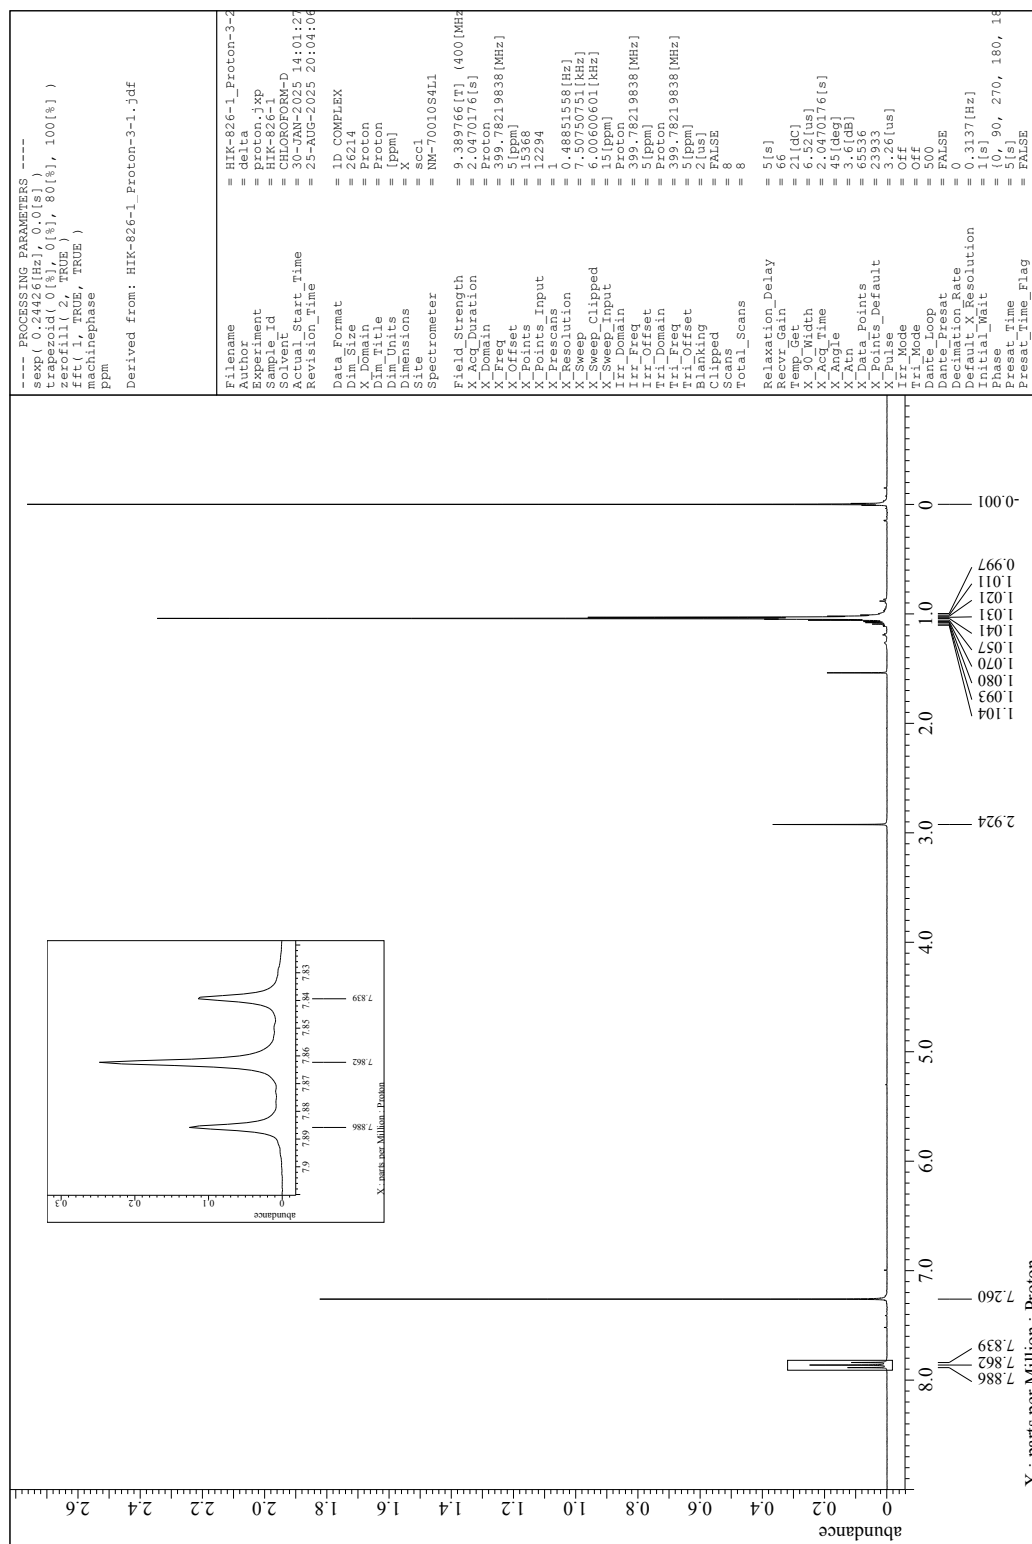

Figure S16. <sup>1</sup>H NMR spectrum (400 MHz, CHCl<sub>3</sub>) of **3c**

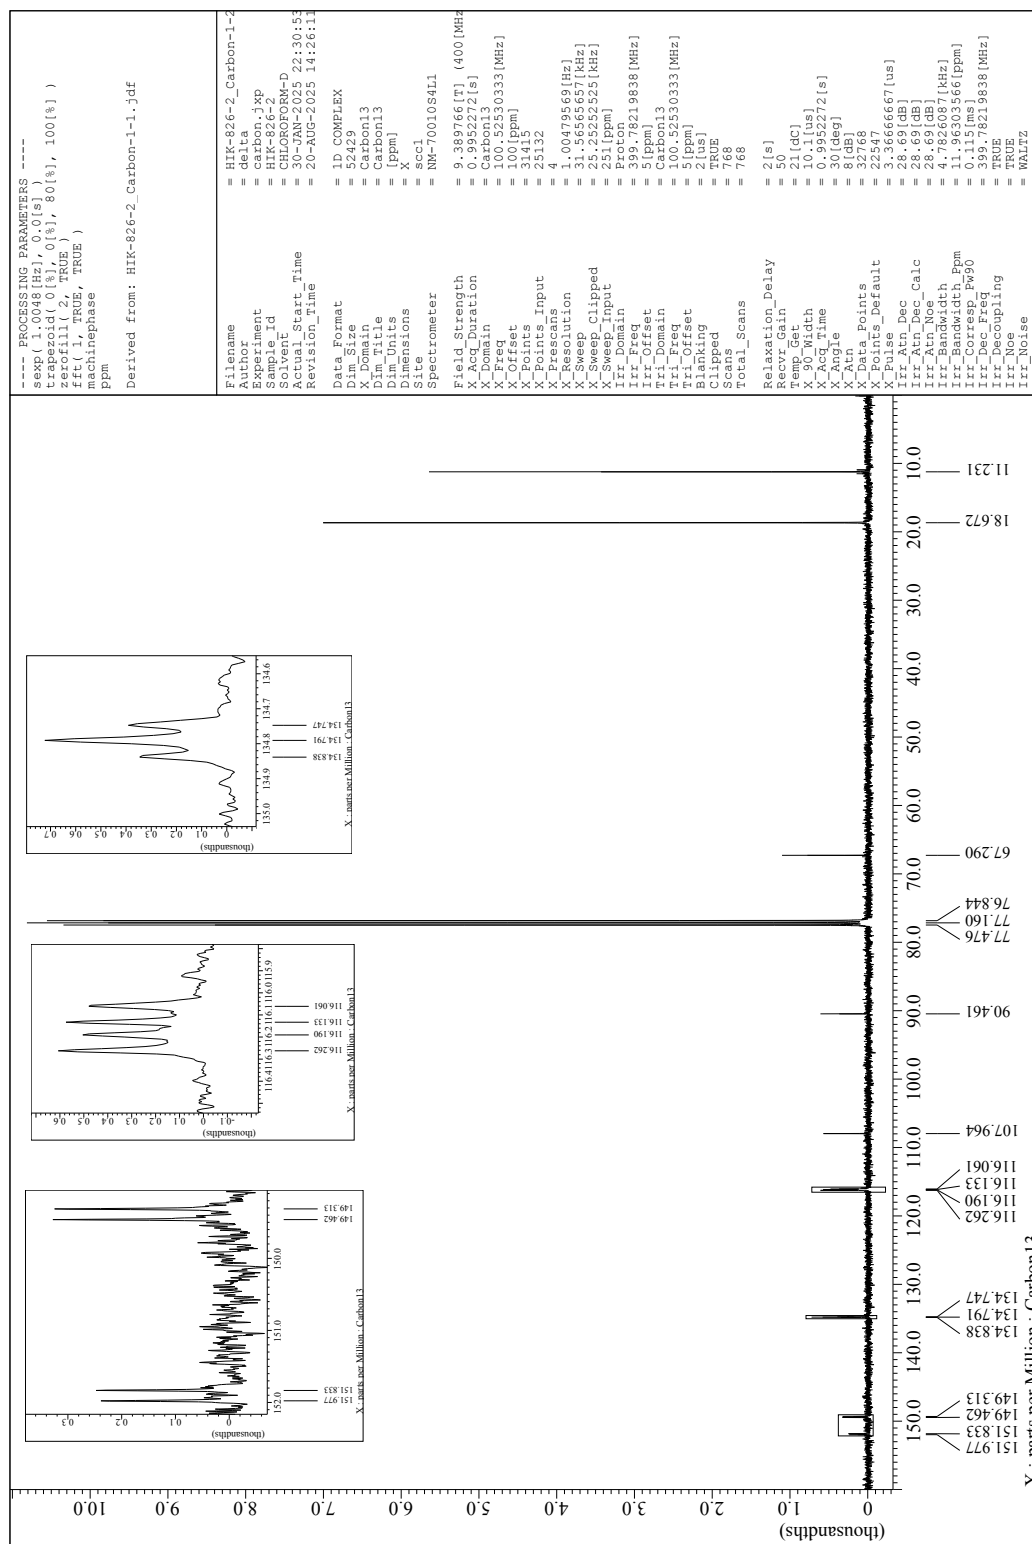

Figure S17. <sup>13</sup>C NMR spectrum (100 MHz, CHCl<sub>3</sub>) of **3c**

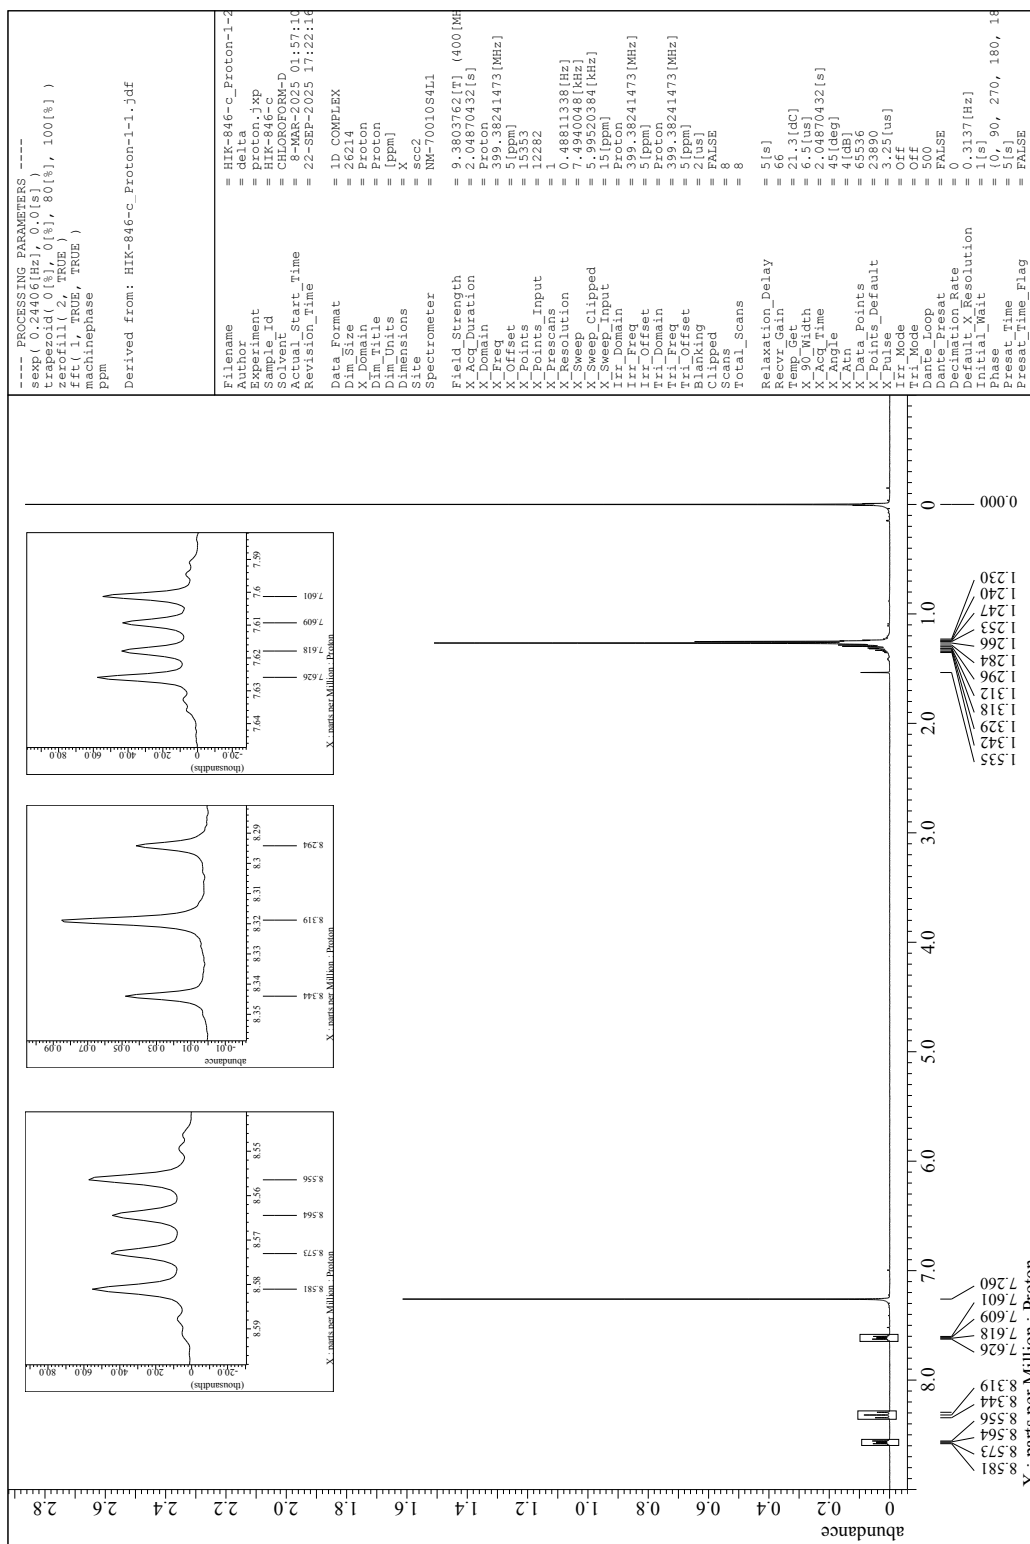

Figure S18. <sup>1</sup>H NMR spectrum (400 MHz, CHCl<sub>3</sub>) of **4b**

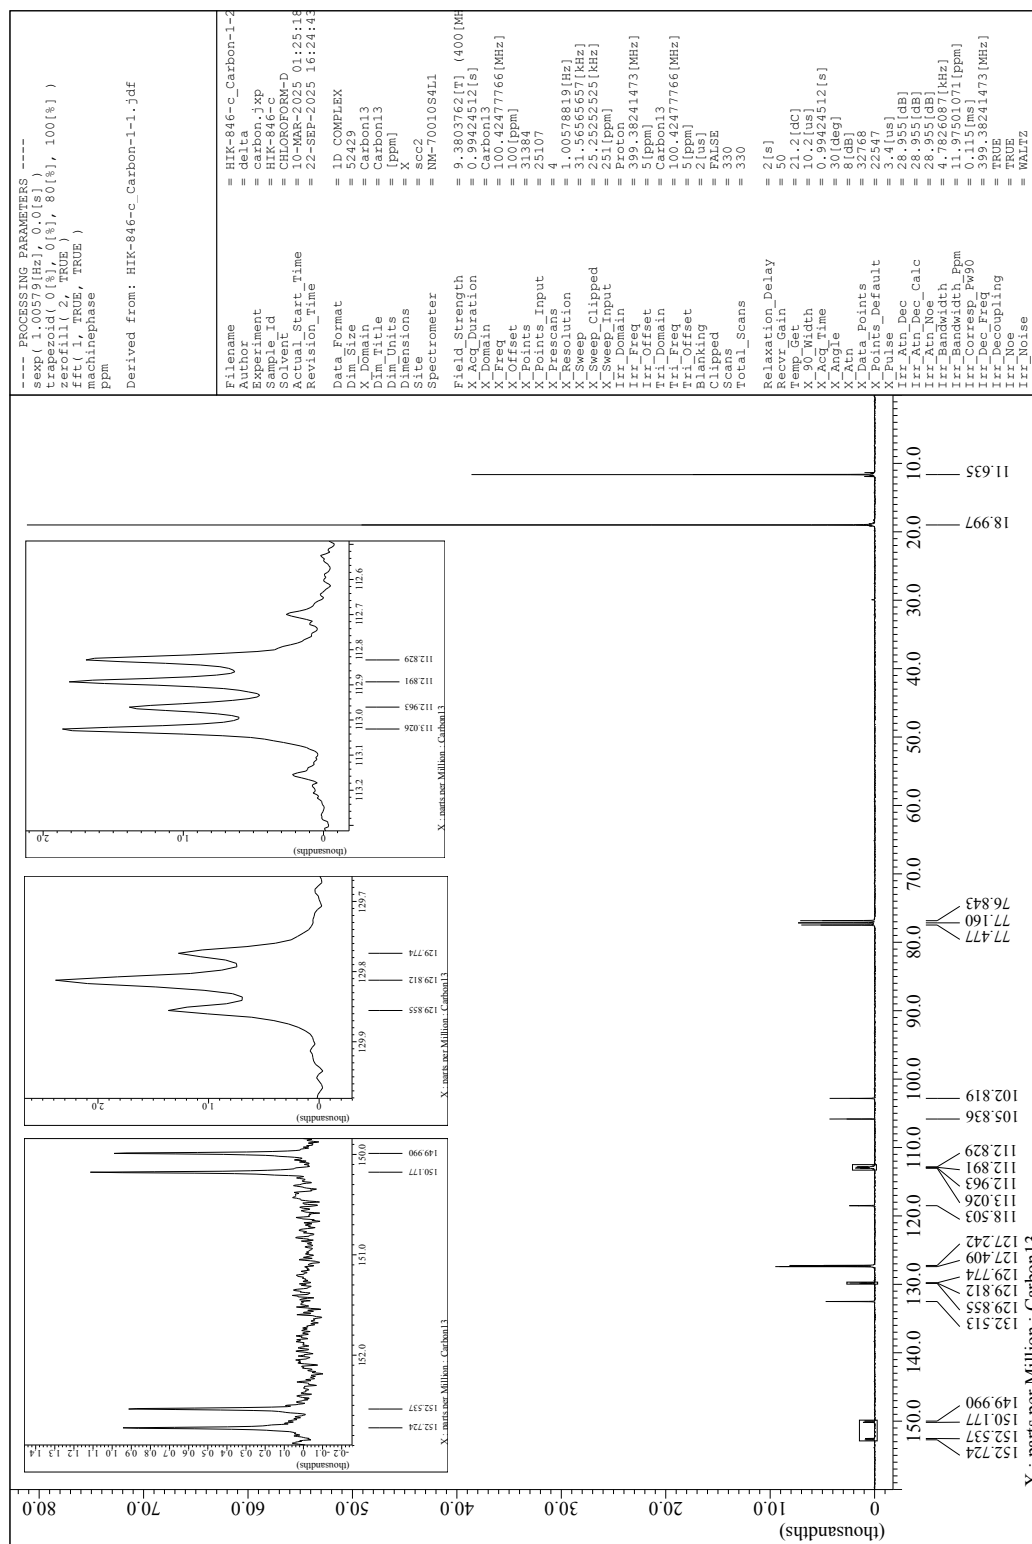

Figure S19. <sup>13</sup>C NMR spectrum (100 MHz, CHCl<sub>3</sub>) of **4b**

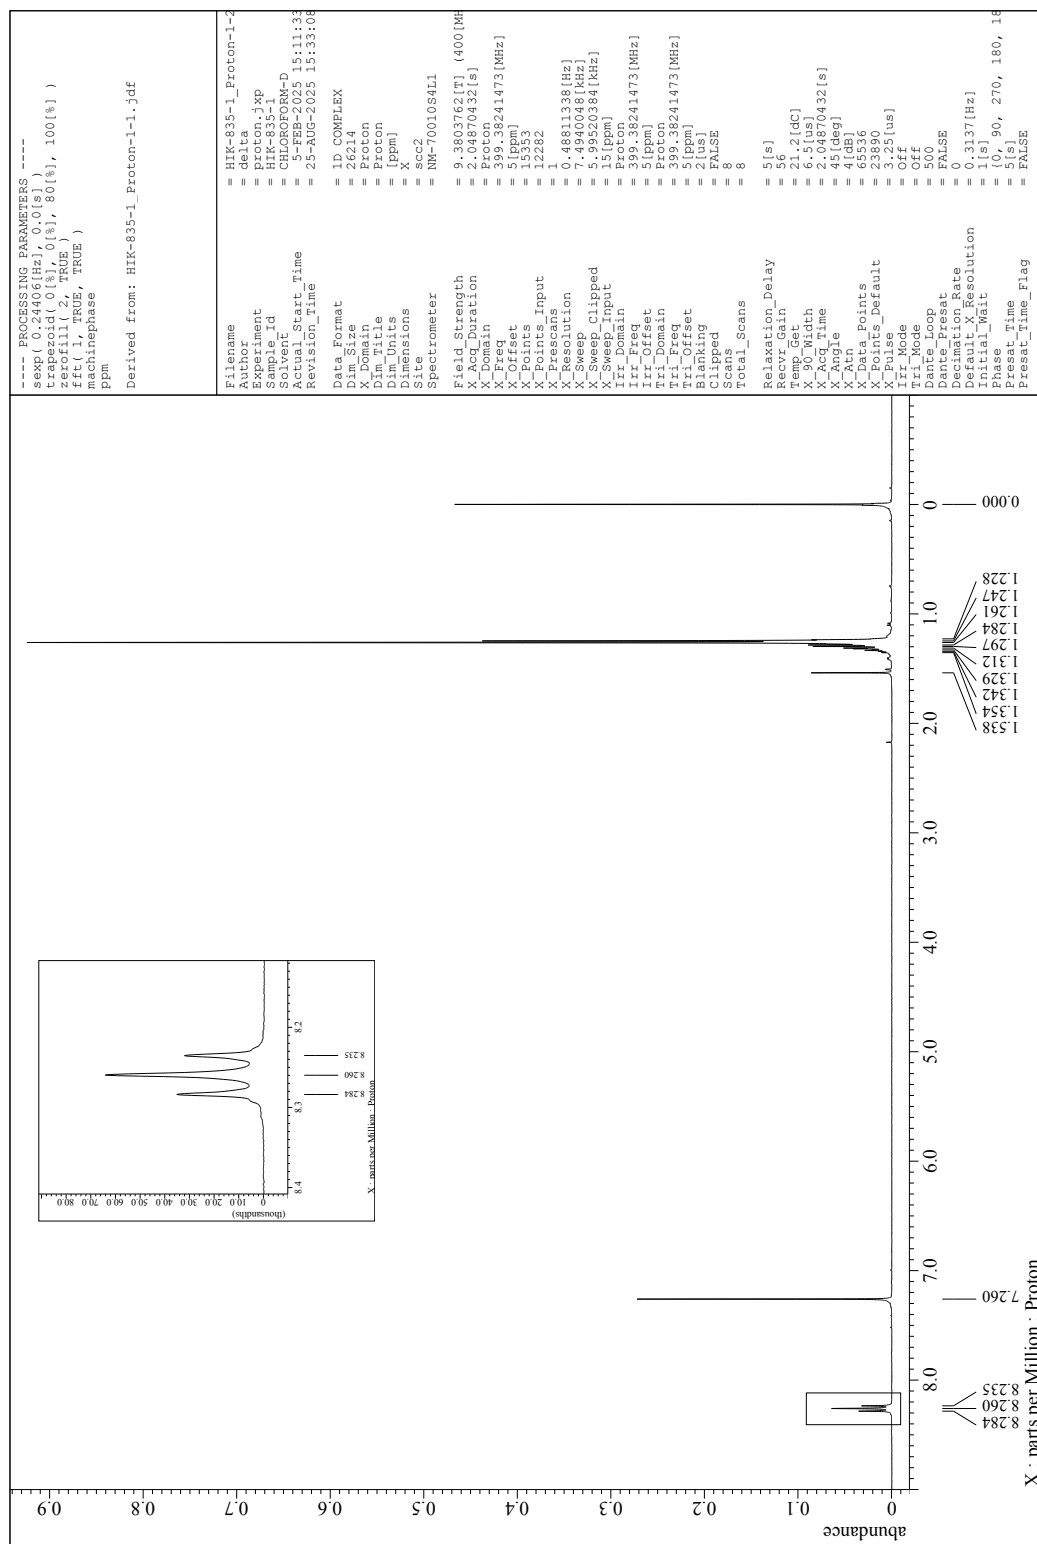

Figure S20. <sup>1</sup>H NMR spectrum (400 MHz, CHCl<sub>3</sub>) of **4c**

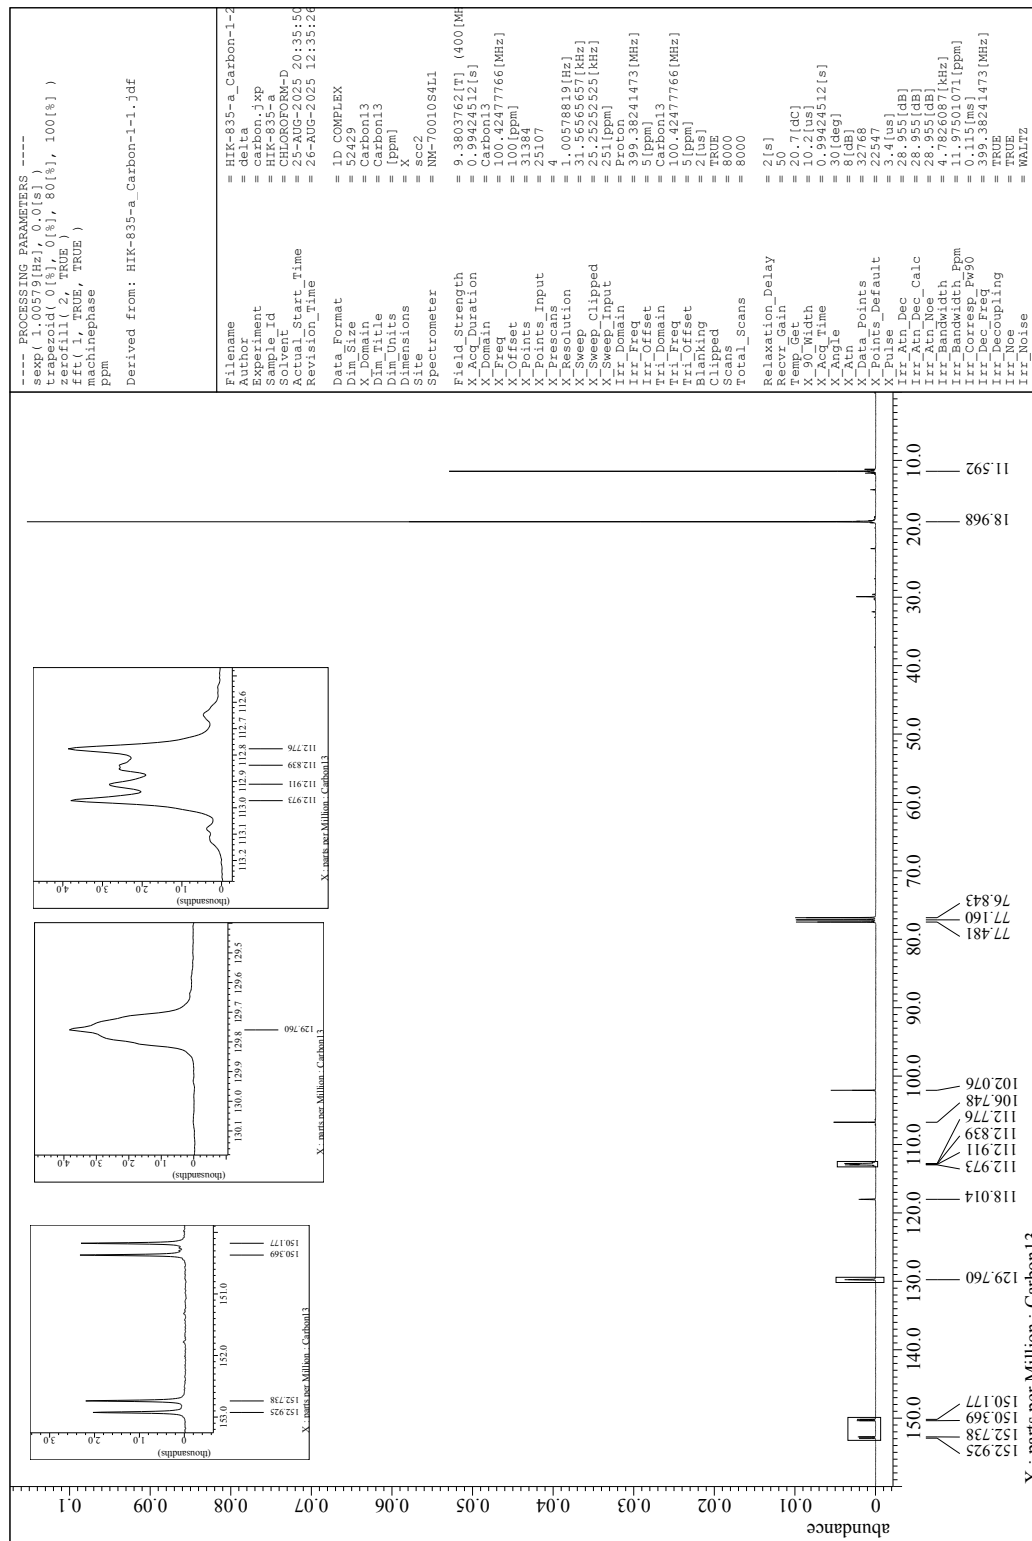

Figure S21. <sup>13</sup>C NMR spectrum (100 MHz, CHCl<sub>3</sub>) of **4c**

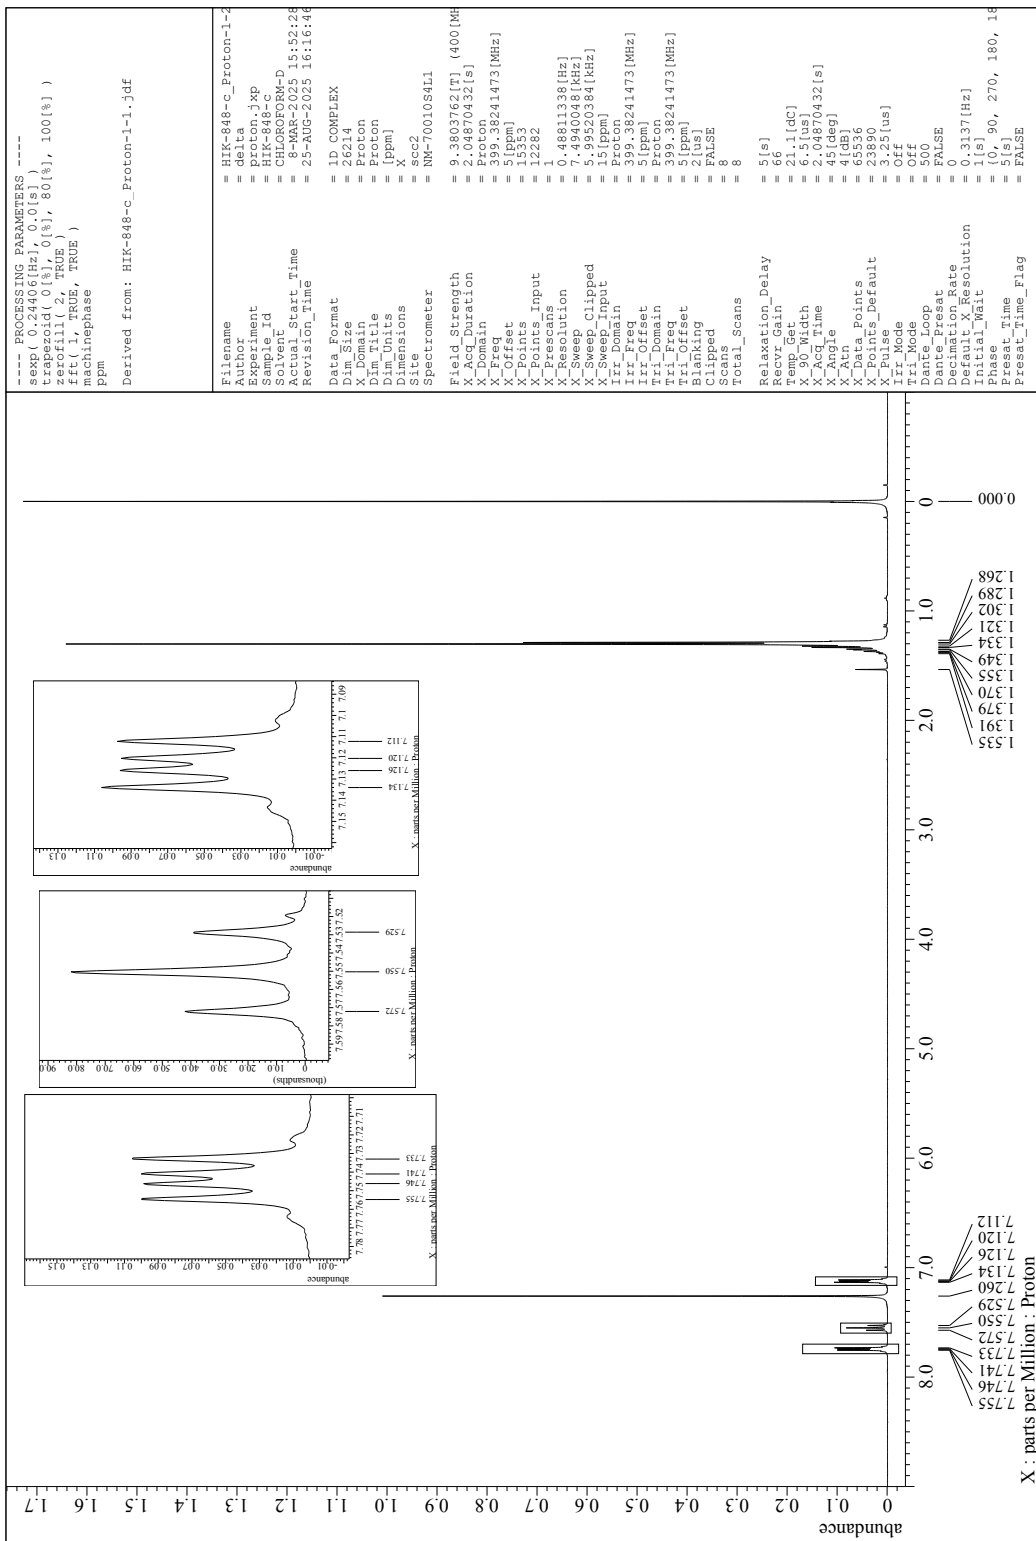

Figure S22. <sup>1</sup>H NMR spectrum (400 MHz, CHCl<sub>3</sub>) of **5b**

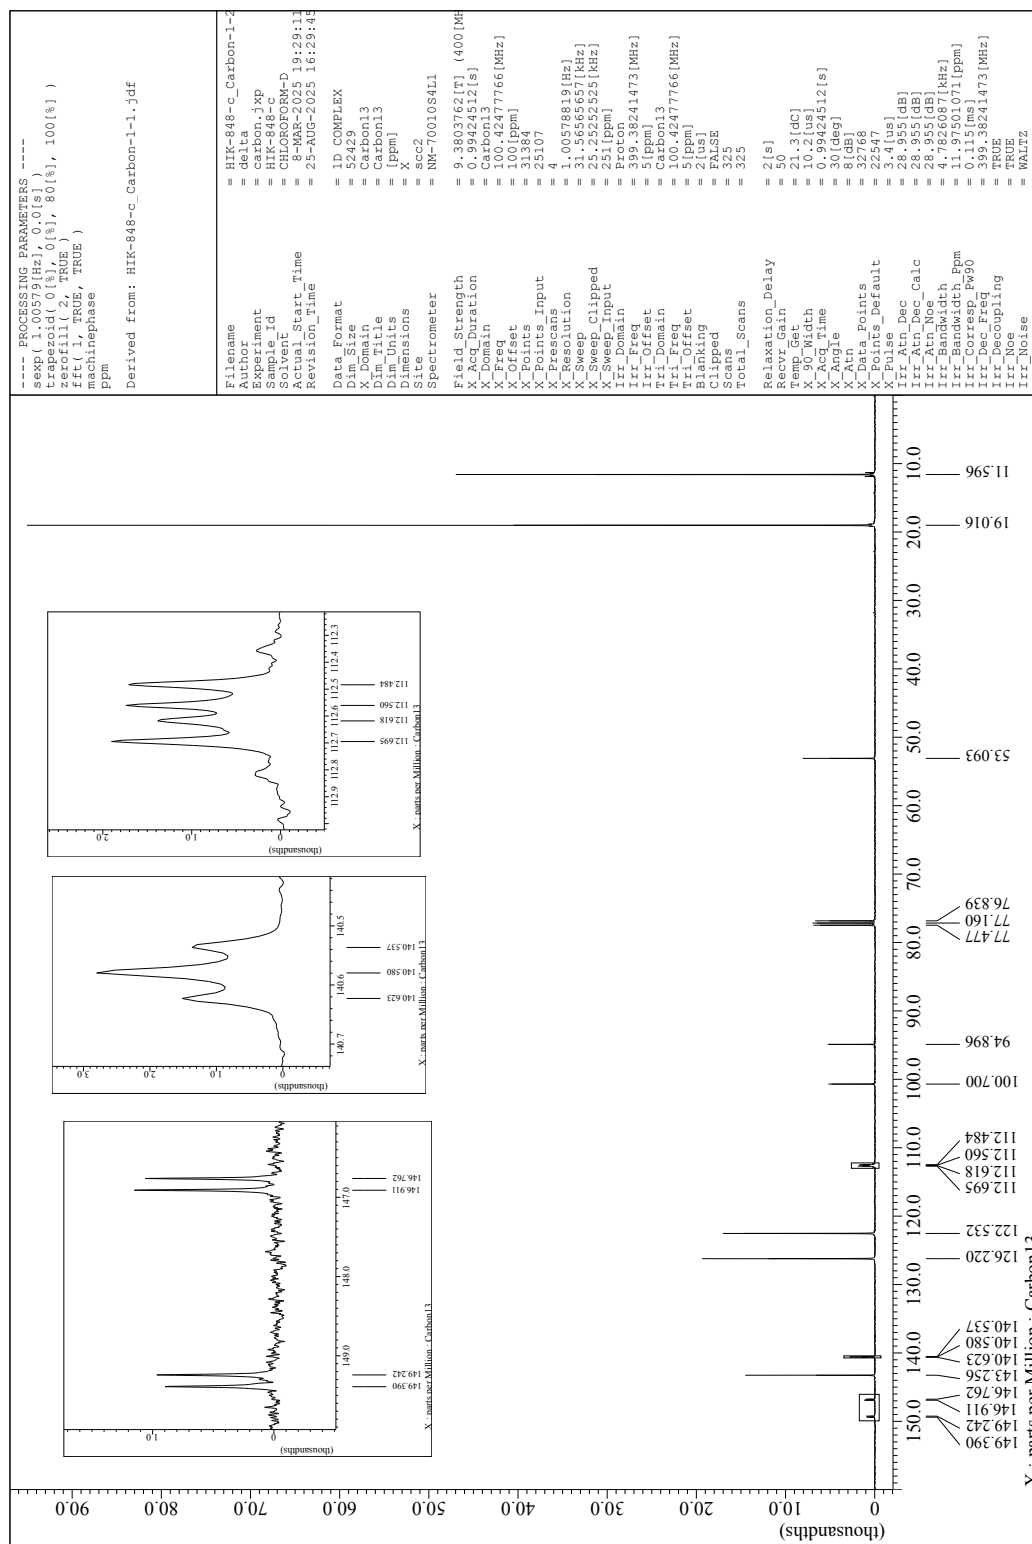

Figure S23. <sup>13</sup>C NMR spectrum (100 MHz, CHCl<sub>3</sub>) of **5b**

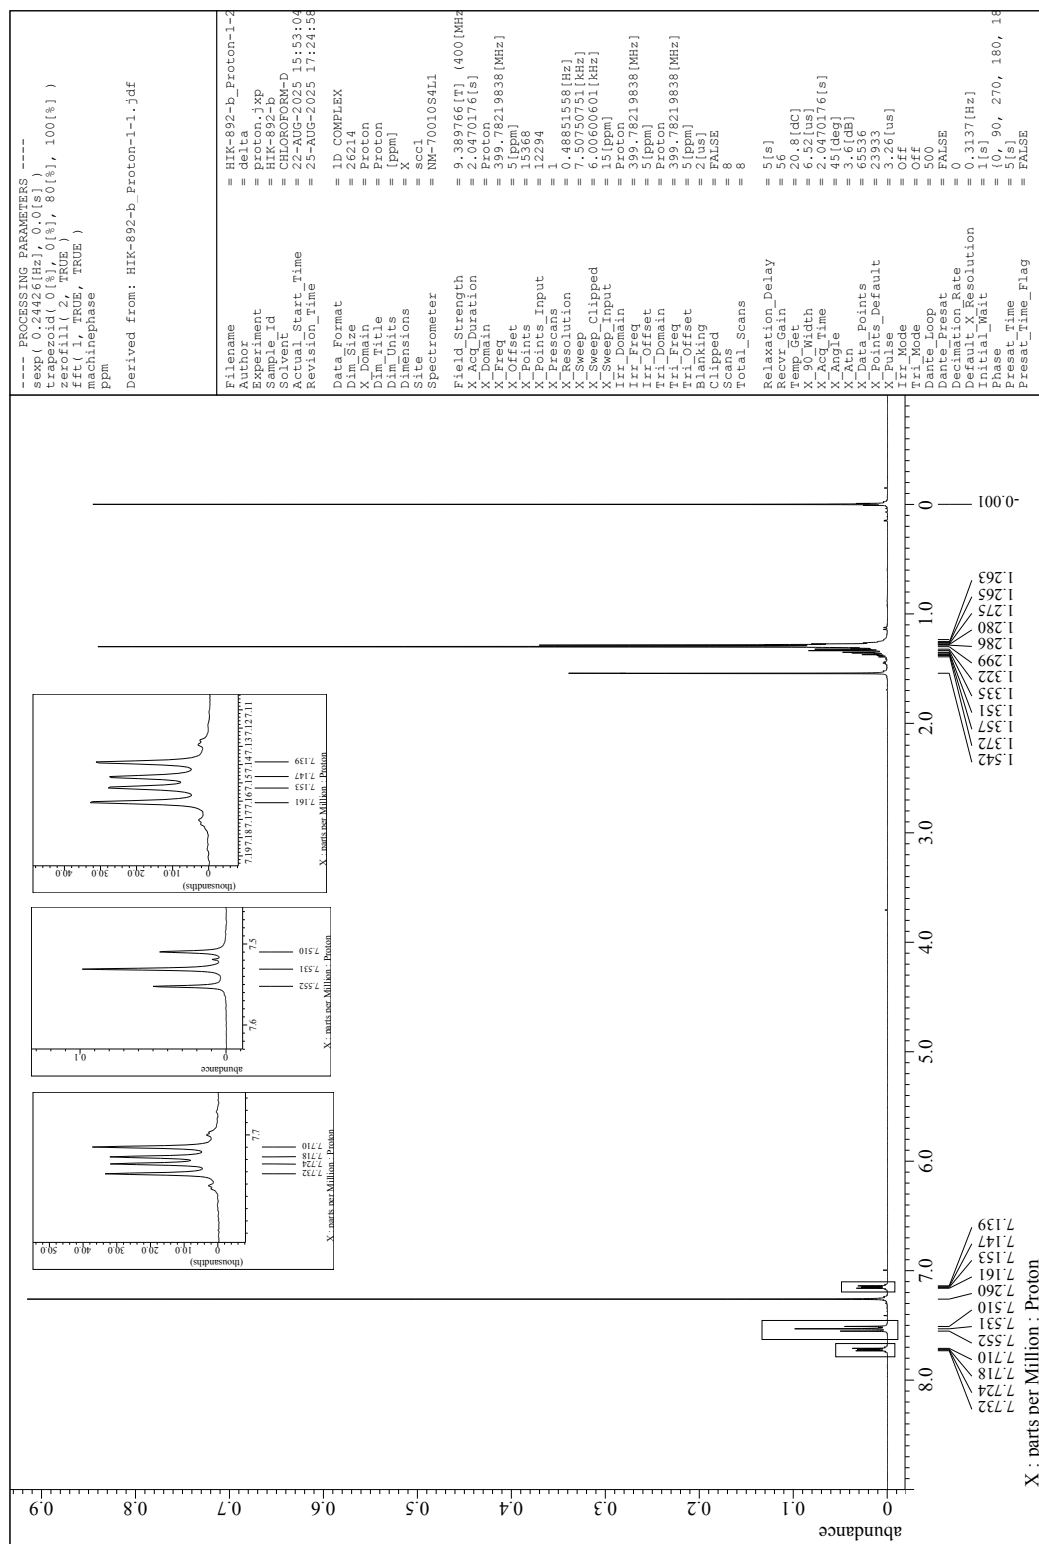

Figure S24. <sup>1</sup>H NMR spectrum (400 MHz, CHCl<sub>3</sub>) of 5c

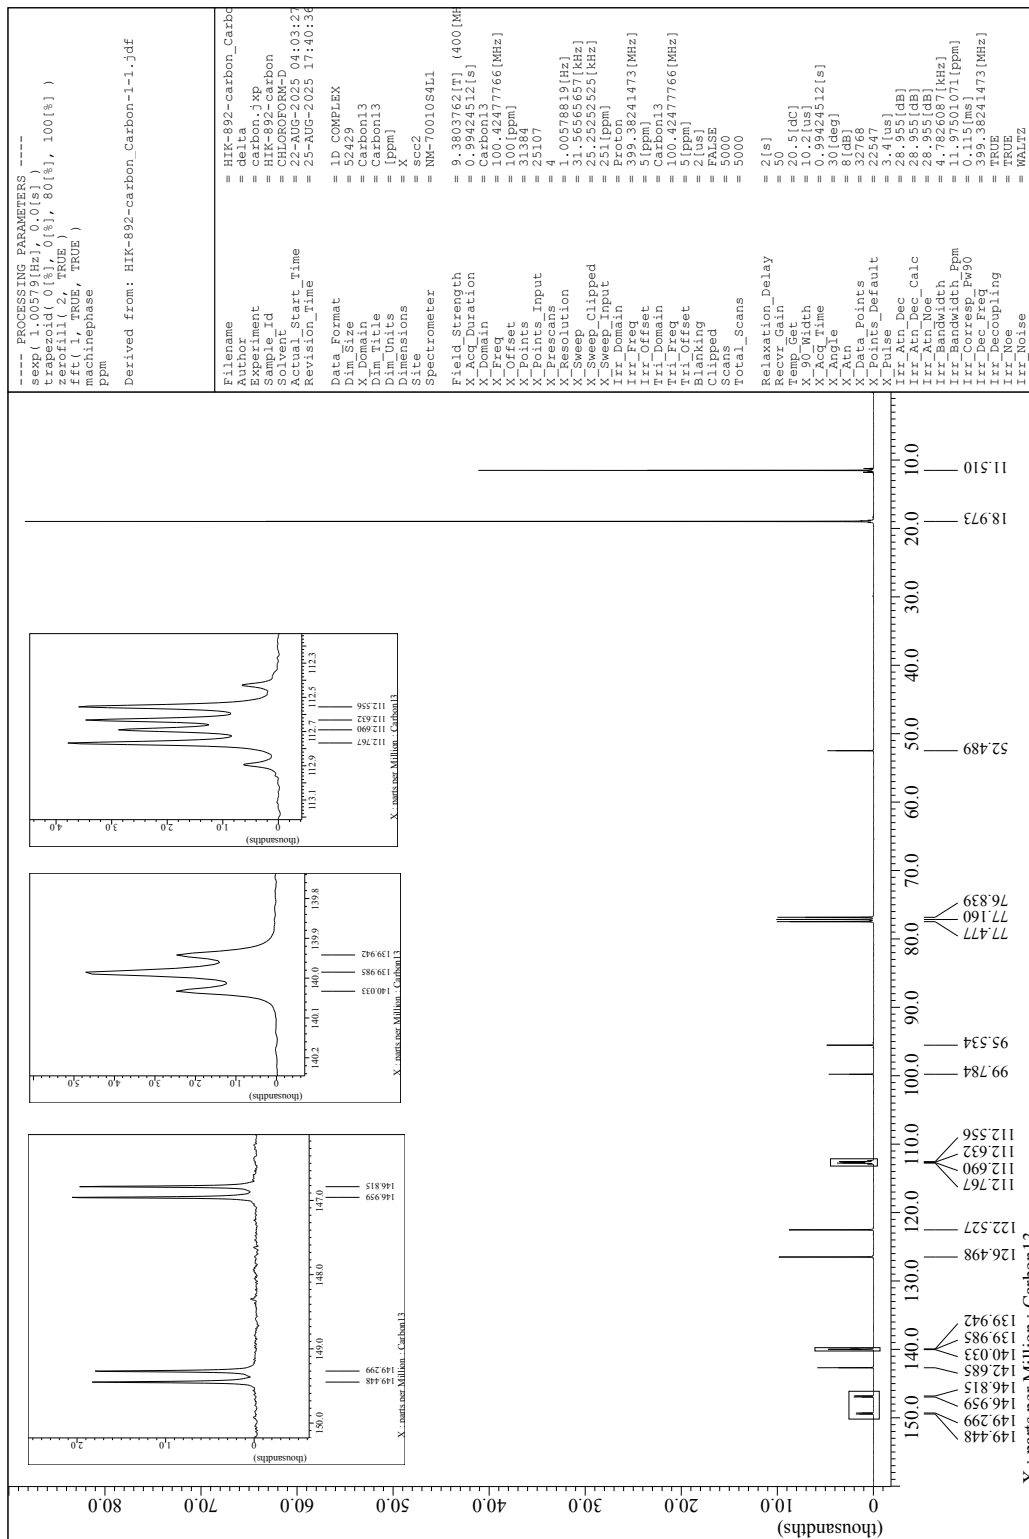

Figure S25. <sup>13</sup>C NMR spectrum (100 MHz, CHCl<sub>3</sub>) of **5c**

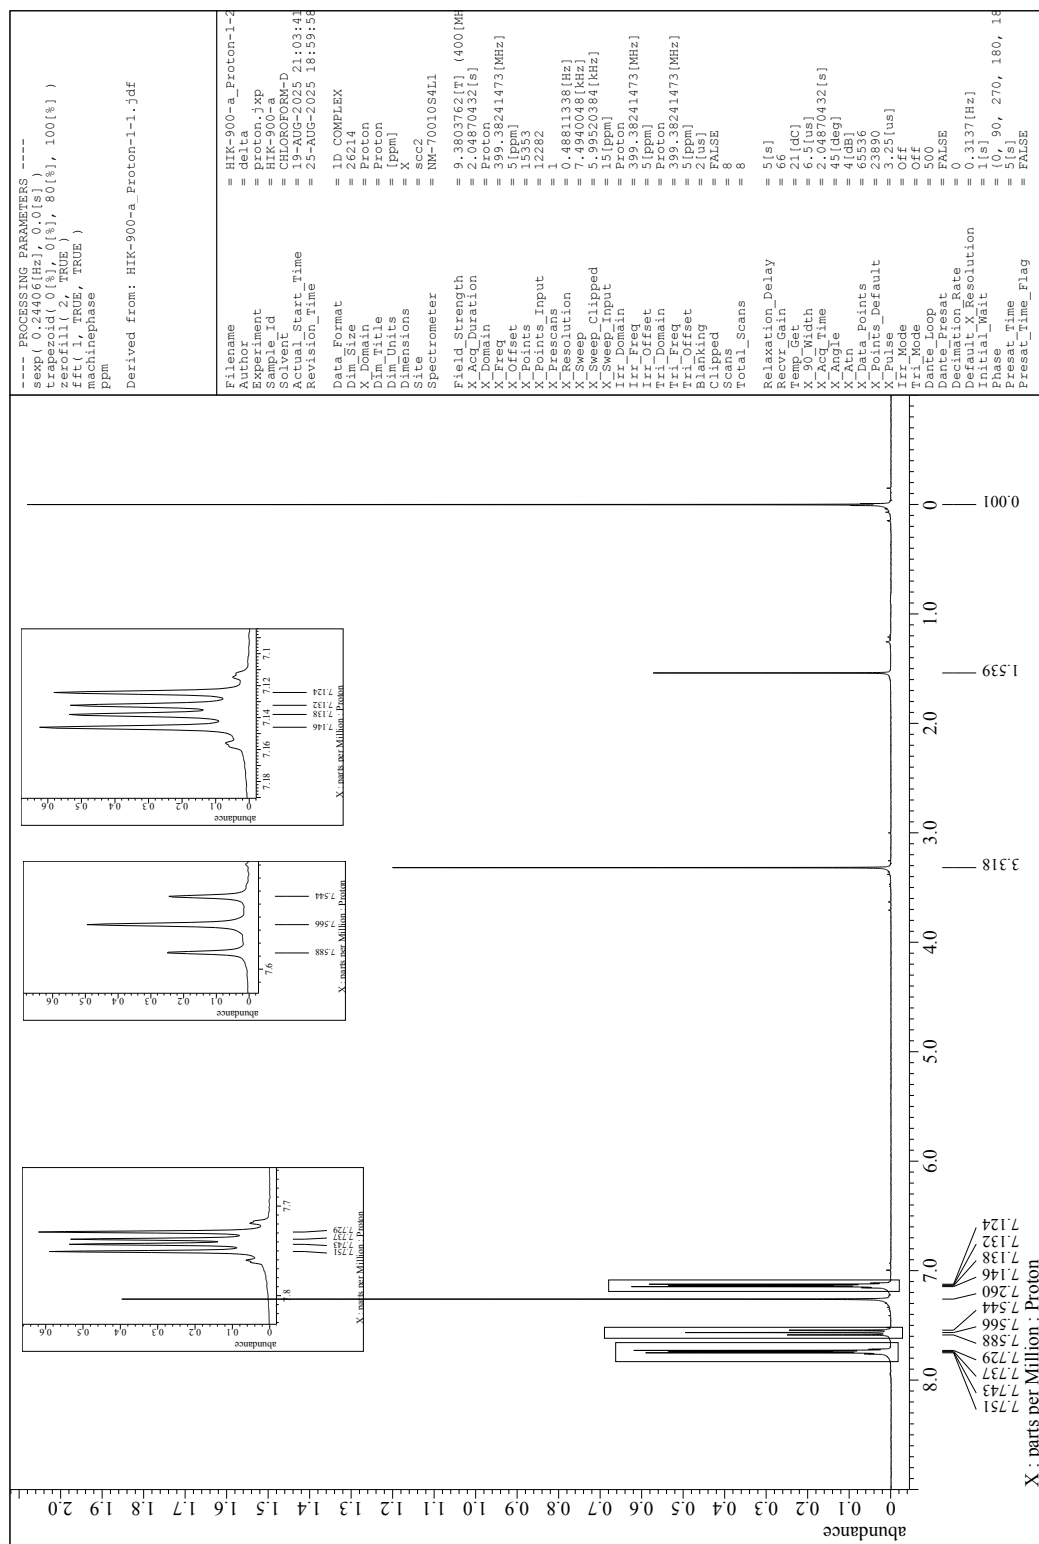

Figure S26. <sup>1</sup>H NMR spectrum (400 MHz, CHCl<sub>3</sub>) of **1b**

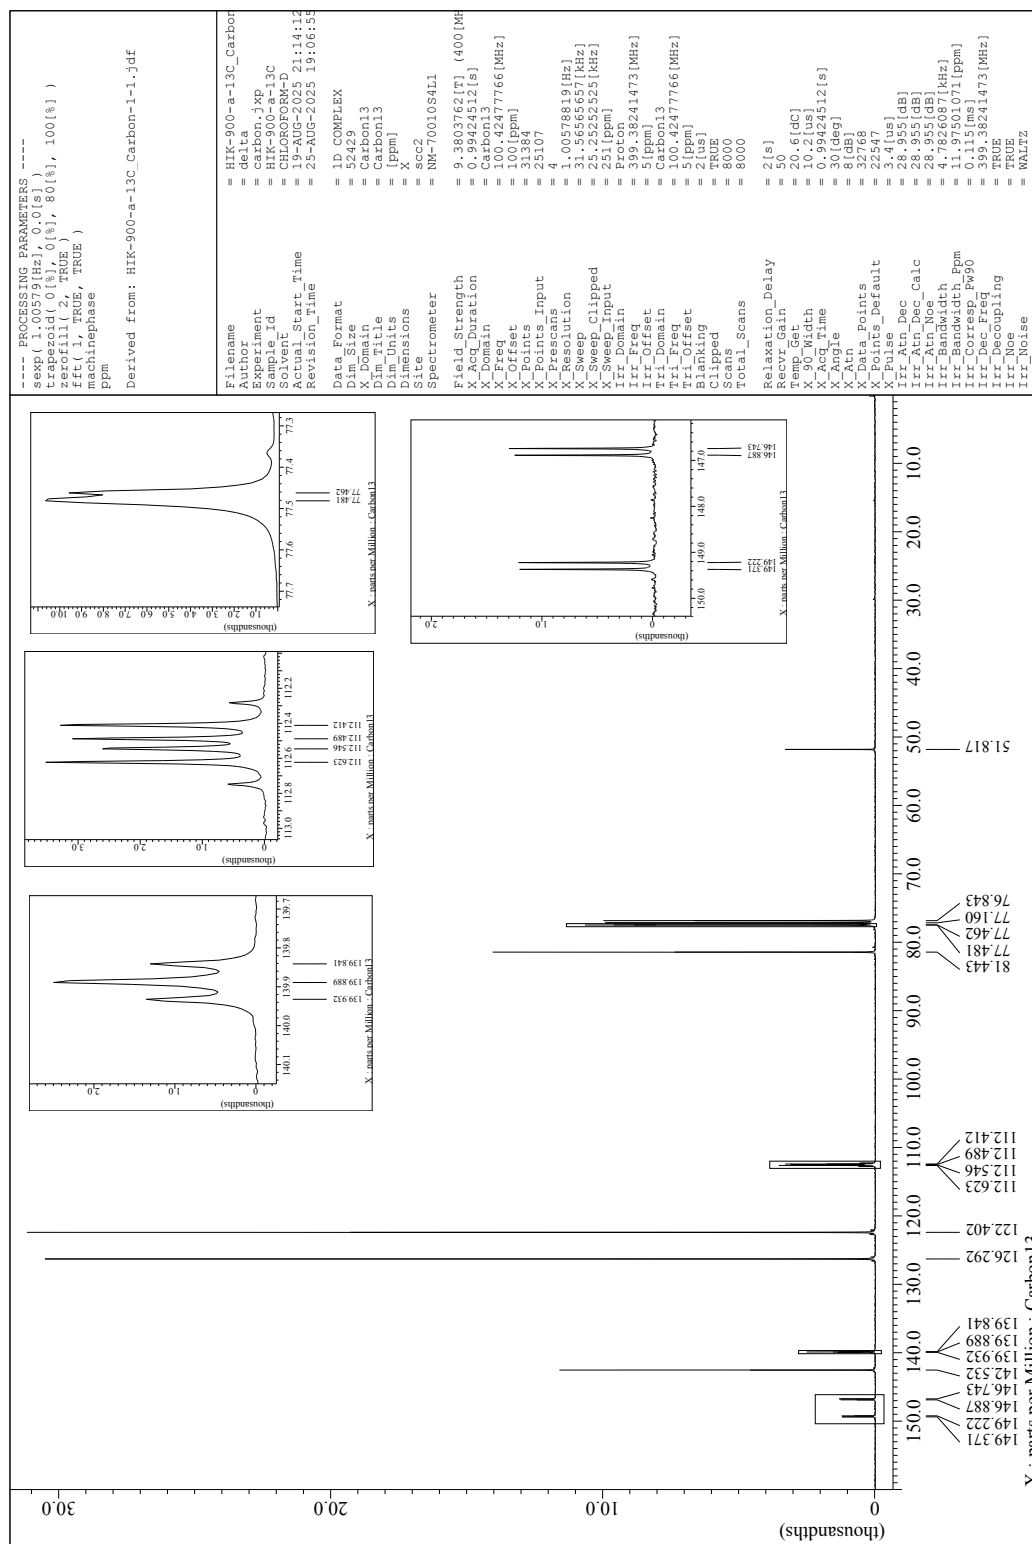

Figure S27. <sup>13</sup>C NMR spectrum (100 MHz, CHCl<sub>3</sub>) of **1b**

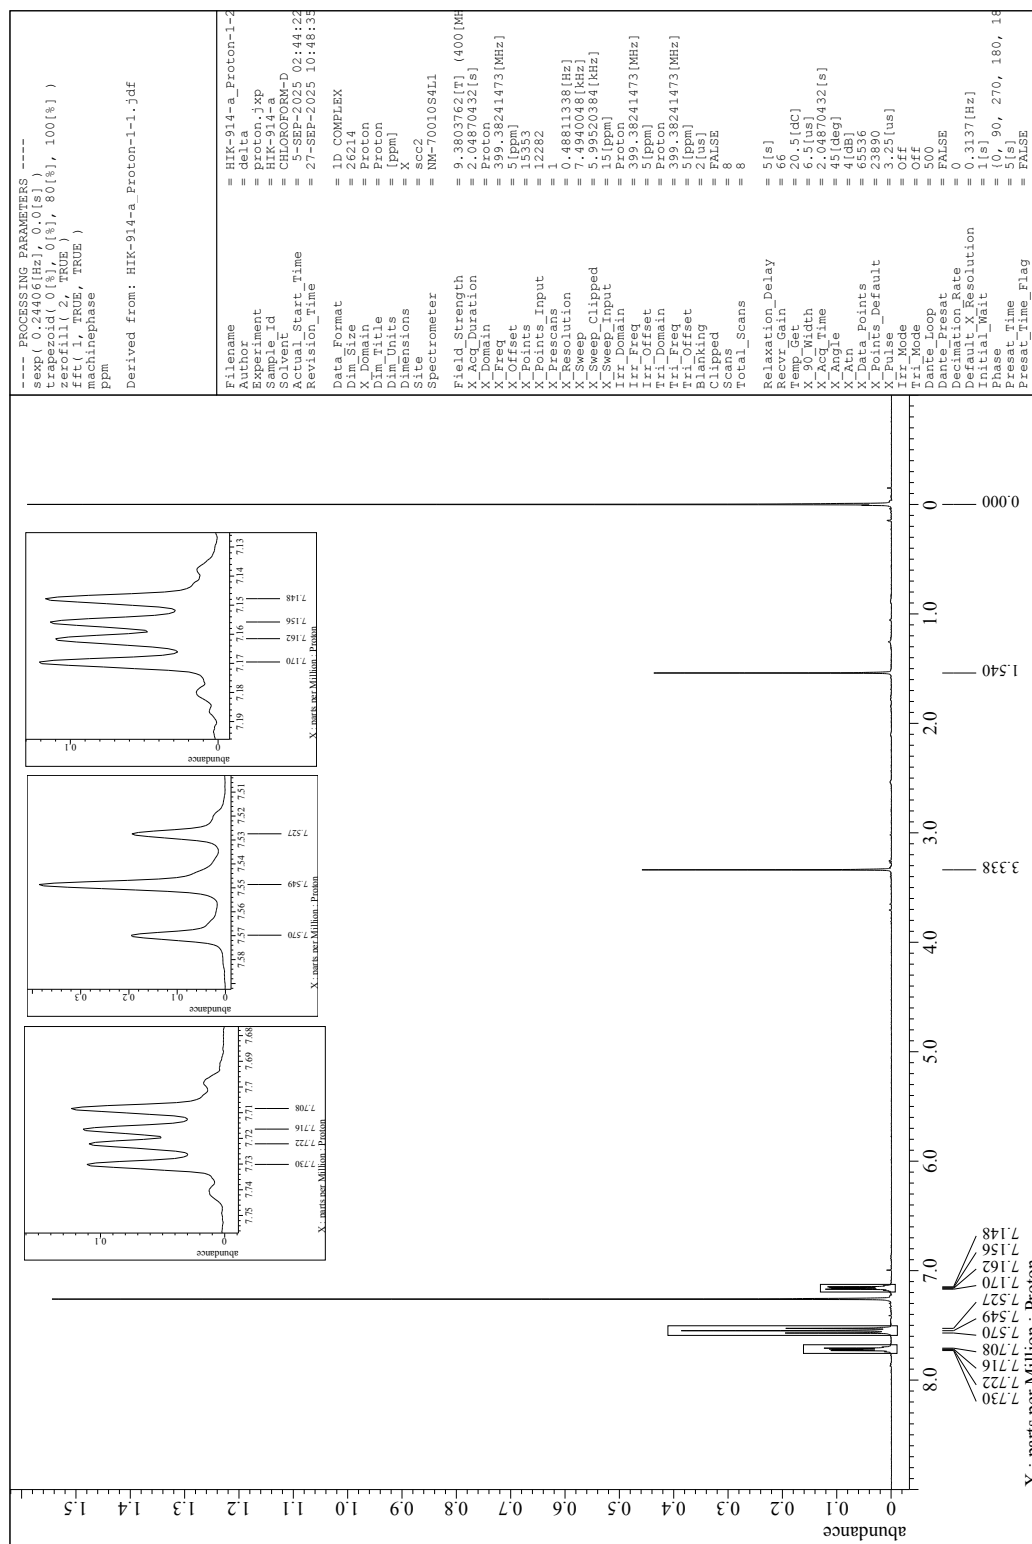

Figure S28. <sup>1</sup>H NMR spectrum (400 MHz, CHCl<sub>3</sub>) of **1c**

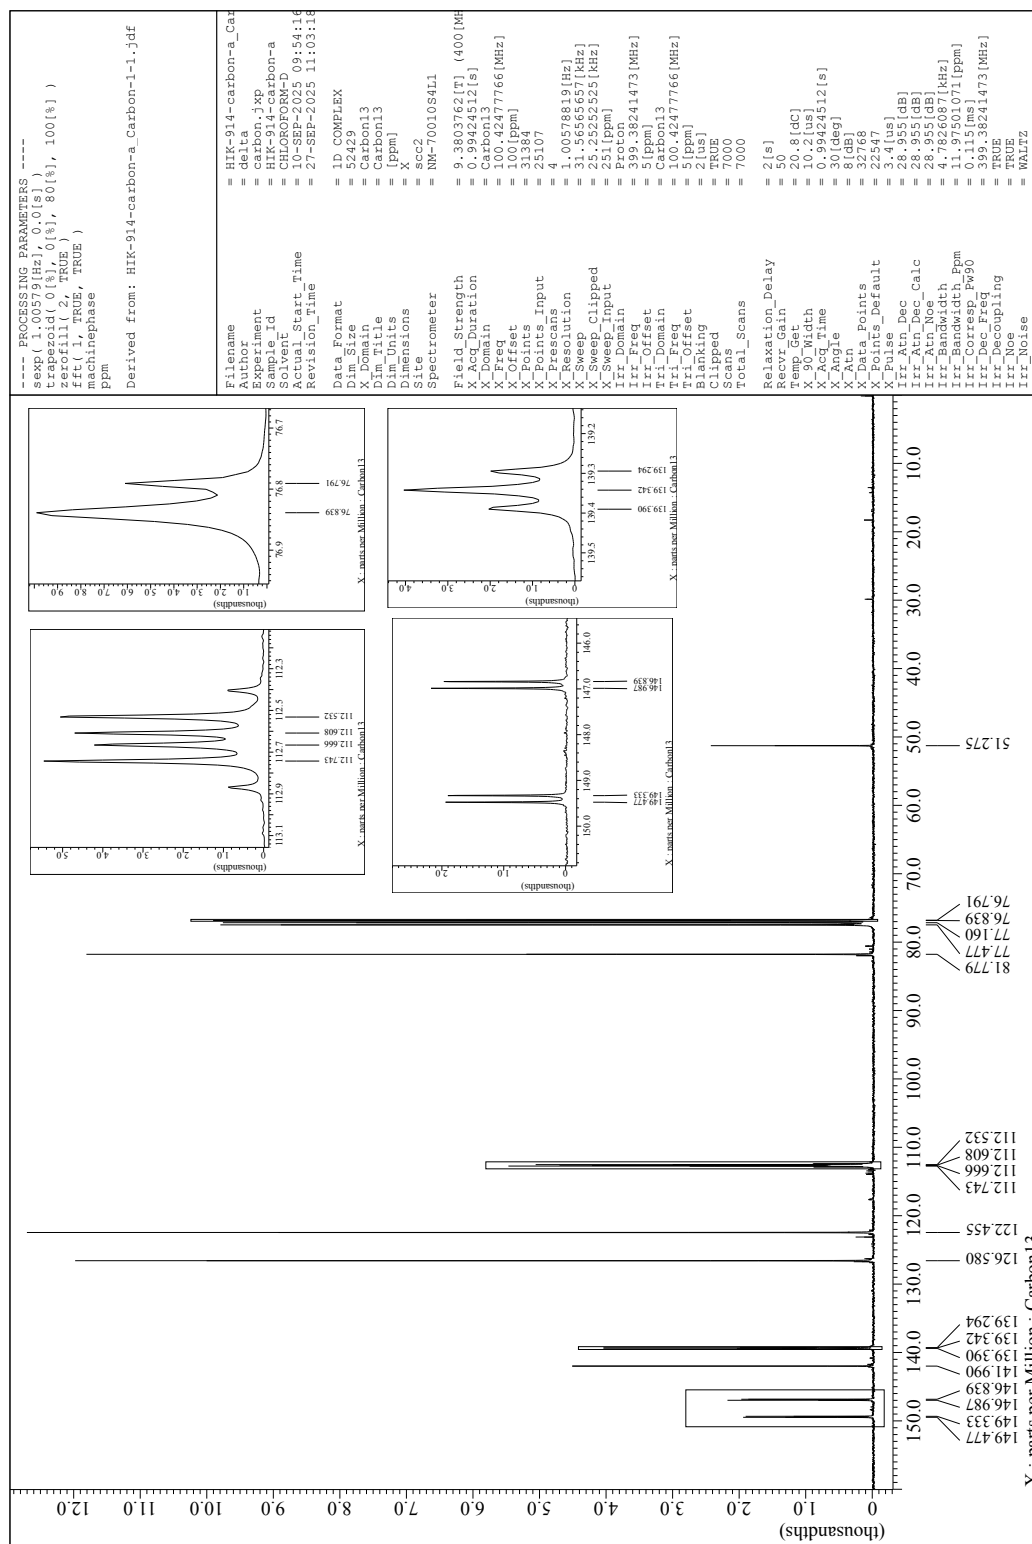

Figure S29. <sup>13</sup>C NMR spectrum (100 MHz, CHCl<sub>3</sub>) of **1c**

## **10. Cartesian Coordinates of the Geometries used in DFT Calculations**

The monomer in crystal **1a**

38

|   |             |             |             |
|---|-------------|-------------|-------------|
| C | 1.28850000  | 9.21980000  | 4.61330000  |
| C | 3.38940000  | 9.32760000  | 3.34950000  |
| C | 1.49590000  | 10.51690000 | 5.07550000  |
| C | 0.57290000  | 8.32140000  | 5.38430000  |
| H | 0.42630000  | 7.45440000  | 5.08210000  |
| C | 2.30020000  | 11.39560000 | 4.10330000  |
| C | 0.99590000  | 10.91650000 | 6.29520000  |
| H | 1.13480000  | 11.78420000 | 6.59970000  |
| C | 3.59860000  | 10.61250000 | 3.83410000  |
| C | 2.53900000  | 12.74580000 | 4.61030000  |
| C | 1.51680000  | 11.33540000 | 2.77590000  |
| C | 1.90050000  | 8.95660000  | 3.22760000  |
| C | 1.30070000  | 10.04100000 | 2.31680000  |
| C | 4.45800000  | 8.51480000  | 3.02490000  |
| H | 4.31520000  | 7.66080000  | 2.68620000  |
| C | 1.69510000  | 7.58300000  | 2.75650000  |
| C | 4.88700000  | 11.07470000 | 4.03530000  |
| H | 5.03520000  | 11.92750000 | 4.37540000  |
| C | 0.12480000  | 10.90450000 | 0.43220000  |
| H | -0.34480000 | 10.76740000 | -0.35850000 |
| C | 1.03580000  | 12.41950000 | 2.06470000  |
| H | 1.17690000  | 13.28710000 | 2.36800000  |
| C | 0.28300000  | 10.00860000 | 7.06390000  |
| H | -0.05830000 | 10.26970000 | 7.88900000  |
| C | 0.60410000  | 9.81740000  | 1.14190000  |
| H | 0.45950000  | 8.95140000  | 0.83530000  |
| C | 0.07640000  | 8.73050000  | 6.61680000  |
| H | -0.40040000 | 8.13020000  | 7.14340000  |
| C | 5.74360000  | 8.98880000  | 3.21190000  |
| H | 6.47020000  | 8.45150000  | 2.99090000  |
| C | 1.56010000  | 6.47060000  | 2.41550000  |
| H | 1.45250000  | 5.58740000  | 2.14510000  |
| C | 2.76250000  | 13.80540000 | 5.06280000  |
| H | 2.93930000  | 14.64520000 | 5.42110000  |
| C | 0.33700000  | 12.18330000 | 0.88470000  |

|   |            |             |            |
|---|------------|-------------|------------|
| H | 0.00910000 | 12.90280000 | 0.39490000 |
| C | 5.95650000 | 10.24720000 | 3.72040000 |
| H | 6.82610000 | 10.54760000 | 3.85630000 |

The monomer in crystal **1b**

38

|   |            |             |             |
|---|------------|-------------|-------------|
| C | 5.12020000 | 10.45260000 | 15.04330000 |
| C | 4.93480000 | 11.24320000 | 16.17290000 |
| C | 7.08830000 | 10.51290000 | 17.05980000 |
| C | 6.97570000 | 12.47290000 | 15.63290000 |
| F | 9.00250000 | 8.74150000  | 19.51800000 |
| C | 7.26380000 | 9.69890000  | 15.93890000 |
| C | 4.03030000 | 9.94450000  | 14.35710000 |
| H | 4.15370000 | 9.41210000  | 13.60450000 |
| C | 7.16350000 | 11.66740000 | 14.51390000 |
| C | 6.24650000 | 11.76210000 | 16.78380000 |
| C | 6.59380000 | 10.24970000 | 14.67200000 |
| F | 9.34420000 | 7.14500000  | 17.38290000 |
| C | 3.66090000 | 11.51980000 | 16.62750000 |
| H | 3.53530000 | 12.03700000 | 17.39010000 |
| C | 6.05060000 | 12.59280000 | 17.97490000 |
| C | 7.66900000 | 10.19430000 | 18.27130000 |
| H | 7.54620000 | 10.73370000 | 19.01900000 |
| C | 7.43700000 | 13.77850000 | 15.65110000 |
| H | 7.30630000 | 14.31880000 | 16.39670000 |
| C | 8.02200000 | 8.54310000  | 16.02400000 |
| H | 8.13690000 | 7.98750000  | 15.28710000 |
| C | 7.81870000 | 12.15830000 | 13.40160000 |
| H | 7.94210000 | 11.62440000 | 12.65030000 |
| C | 2.74700000 | 10.24120000 | 14.80900000 |
| H | 2.00820000 | 9.91340000  | 14.34880000 |
| C | 2.56450000 | 11.01420000 | 15.92920000 |
| H | 1.70300000 | 11.20200000 | 16.22460000 |
| C | 6.76730000 | 9.41190000  | 13.49160000 |
| C | 8.43860000 | 9.04830000  | 18.33730000 |
| C | 5.90190000 | 13.22280000 | 18.95700000 |
| H | 5.78470000 | 13.72080000 | 19.73360000 |
| C | 8.60390000 | 8.24310000  | 17.24710000 |

|   |            |             |             |
|---|------------|-------------|-------------|
| C | 8.09790000 | 14.26230000 | 14.53230000 |
| H | 8.41600000 | 15.13630000 | 14.52980000 |
| C | 8.29100000 | 13.46810000 | 13.42680000 |
| H | 8.74150000 | 13.80900000 | 12.68810000 |
| C | 6.86150000 | 8.74410000  | 12.52270000 |
| H | 6.93510000 | 8.21780000  | 11.75940000 |

The monomer in crystal **1c** ( $P4_1$ )

38

|   |             |             |            |
|---|-------------|-------------|------------|
| F | 9.82050000  | 5.88620000  | 7.10250000 |
| F | 11.86490000 | 13.12040000 | 2.46910000 |
| F | 11.36180000 | 7.43410000  | 8.66070000 |
| F | 10.33830000 | 11.53350000 | 0.93880000 |
| C | 8.84530000  | 9.15650000  | 5.95950000 |
| C | 9.79370000  | 11.58580000 | 4.95940000 |
| C | 8.89090000  | 7.76150000  | 6.05540000 |
| H | 8.34790000  | 7.21330000  | 5.50160000 |
| C | 9.65420000  | 9.95600000  | 6.76020000 |
| C | 7.98820000  | 11.73610000 | 6.64130000 |
| C | 9.75480000  | 7.20740000  | 6.98740000 |
| C | 10.91380000 | 12.38260000 | 3.03780000 |
| C | 9.49320000  | 11.45980000 | 6.47060000 |
| C | 9.01030000  | 10.78640000 | 4.14910000 |
| C | 7.18460000  | 10.95000000 | 5.81380000 |
| C | 9.15390000  | 10.76890000 | 2.78460000 |
| H | 8.60050000  | 10.22360000 | 2.23810000 |
| C | 10.55830000 | 8.01100000  | 7.77560000 |
| C | 7.12700000  | 9.11360000  | 4.10880000 |
| C | 7.98950000  | 9.94930000  | 4.95550000 |
| C | 10.51540000 | 9.38460000  | 7.68070000 |
| H | 11.06530000 | 9.92630000  | 8.23450000 |
| C | 10.37190000 | 12.30350000 | 7.27800000 |
| C | 5.82580000  | 11.09890000 | 5.81380000 |
| H | 5.27930000  | 10.58550000 | 5.23090000 |
| C | 7.42740000  | 12.64150000 | 7.51100000 |
| H | 7.97000000  | 13.17020000 | 8.08420000 |
| C | 10.75550000 | 12.42830000 | 4.39650000 |
| H | 11.27950000 | 13.01040000 | 4.93560000 |

|   |             |             |            |
|---|-------------|-------------|------------|
| C | 10.12500000 | 11.56840000 | 2.24090000 |
| C | 5.26100000  | 12.02720000 | 6.69500000 |
| H | 4.31820000  | 12.14340000 | 6.70980000 |
| C | 6.45490000  | 8.46300000  | 3.39450000 |
| H | 5.91260000  | 7.93710000  | 2.81750000 |
| C | 6.03370000  | 12.75960000 | 7.52440000 |
| H | 5.62250000  | 13.36730000 | 8.12820000 |
| C | 11.11770000 | 12.99030000 | 7.91370000 |
| H | 11.70900000 | 13.53460000 | 8.41950000 |

The unit cell in crystal **1c** ( $P4_1$ )

114

|   |             |             |            |
|---|-------------|-------------|------------|
| F | 9.82050000  | 5.88620000  | 7.10250000 |
| F | 11.86490000 | 13.12040000 | 2.46910000 |
| F | 11.36180000 | 7.43410000  | 8.66070000 |
| F | 10.33830000 | 11.53350000 | 0.93880000 |
| C | 8.84530000  | 9.15650000  | 5.95950000 |
| C | 9.79370000  | 11.58580000 | 4.95940000 |
| C | 8.89090000  | 7.76150000  | 6.05540000 |
| H | 8.34790000  | 7.21330000  | 5.50160000 |
| C | 9.65420000  | 9.95600000  | 6.76020000 |
| C | 7.98820000  | 11.73610000 | 6.64130000 |
| C | 9.75480000  | 7.20740000  | 6.98740000 |
| C | 10.91380000 | 12.38260000 | 3.03780000 |
| C | 9.49320000  | 11.45980000 | 6.47060000 |
| C | 9.01030000  | 10.78640000 | 4.14910000 |
| C | 7.18460000  | 10.95000000 | 5.81380000 |
| C | 9.15390000  | 10.76890000 | 2.78460000 |
| H | 8.60050000  | 10.22360000 | 2.23810000 |
| C | 10.55830000 | 8.01100000  | 7.77560000 |
| C | 7.12700000  | 9.11360000  | 4.10880000 |
| C | 7.98950000  | 9.94930000  | 4.95550000 |
| C | 10.51540000 | 9.38460000  | 7.68070000 |
| H | 11.06530000 | 9.92630000  | 8.23450000 |
| C | 10.37190000 | 12.30350000 | 7.27800000 |
| C | 5.82580000  | 11.09890000 | 5.81380000 |
| H | 5.27930000  | 10.58550000 | 5.23090000 |
| C | 7.42740000  | 12.64150000 | 7.51100000 |

|   |             |             |            |
|---|-------------|-------------|------------|
| H | 7.97000000  | 13.17020000 | 8.08420000 |
| C | 10.75550000 | 12.42830000 | 4.39650000 |
| H | 11.27950000 | 13.01040000 | 4.93560000 |
| C | 10.12500000 | 11.56840000 | 2.24090000 |
| C | 5.26100000  | 12.02720000 | 6.69500000 |
| H | 4.31820000  | 12.14340000 | 6.70980000 |
| C | 6.45490000  | 8.46300000  | 3.39450000 |
| H | 5.91260000  | 7.93710000  | 2.81750000 |
| C | 6.03370000  | 12.75960000 | 7.52440000 |
| H | 5.62250000  | 13.36730000 | 8.12820000 |
| C | 11.11770000 | 12.99030000 | 7.91370000 |
| H | 11.70900000 | 13.53460000 | 8.41950000 |
